# Supplementary material for: Real-world assessment of immunogenicity in immunocompromised individuals following SARS-CoV-2 mRNA vaccination: a one-year follow-up of the prospective clinical trial COVAXID
Source: PubMed Central journal article supplement (PMC10365982; doi:10.1016/j.ebiom.2023.104700), 2023-07-13
Supplement: mmc1.pdf [file mmc1.pdf]

## **Appendix: Supplemental Figures & Tables**

Supplement to: Chen P, Bergman P, Blennow O, et al. Real-world assessment of immunogenicity in immunocompromised individuals following SARS-CoV-2 mRNA vaccination: A one-year follow-up of the prospective clinical trial COVAXID

## **Table of contents**

### **Figures**

- p1. Supplementary Figure S1: Correlation between Roche-Elecsys and MSD platform for SARS-CoV-2 Spike-RBD**
- p2. Supplementary Figure S2: Subgroup-stratified dynamics of SARS-CoV-2 Wu-Hu.1 Ab titres**
- p3. Supplementary Figure S3: Comparison of Ab titres between subgroups**
- p4. Supplementary Figure S4: Comparison of Spike neutralization between subgroups**
- p5. Supplementary Figure S5: Nucleocapsid titres in verified and unverified COVID-19 cases**

### **Tables**

- p6. Supplementary Table S1: Non-dichotomized p-values**
- p15. Supplementary Table S2: Demographics and antibody titres in reconsented study subjects and drop-outs**
- p16. Supplementary Table S3: Number of administered 3rd and 4th vaccine doses**

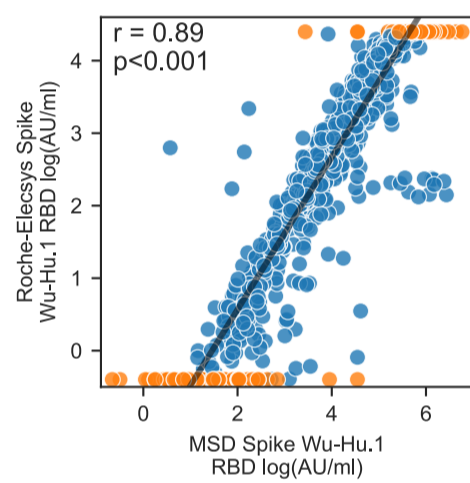

**Supplementary Figure S1. Correlation between Roche-Elecsys and MSD platform for SARS-CoV-2 Spike-RBD.** Values below 0.4 or above 25,000 on the Elecsys platform are indicated in orange. R = Pearson correlation coefficient. Correlation and p-value are calculated on log-transformed values within detection range on the Roche-Elecsys platform.

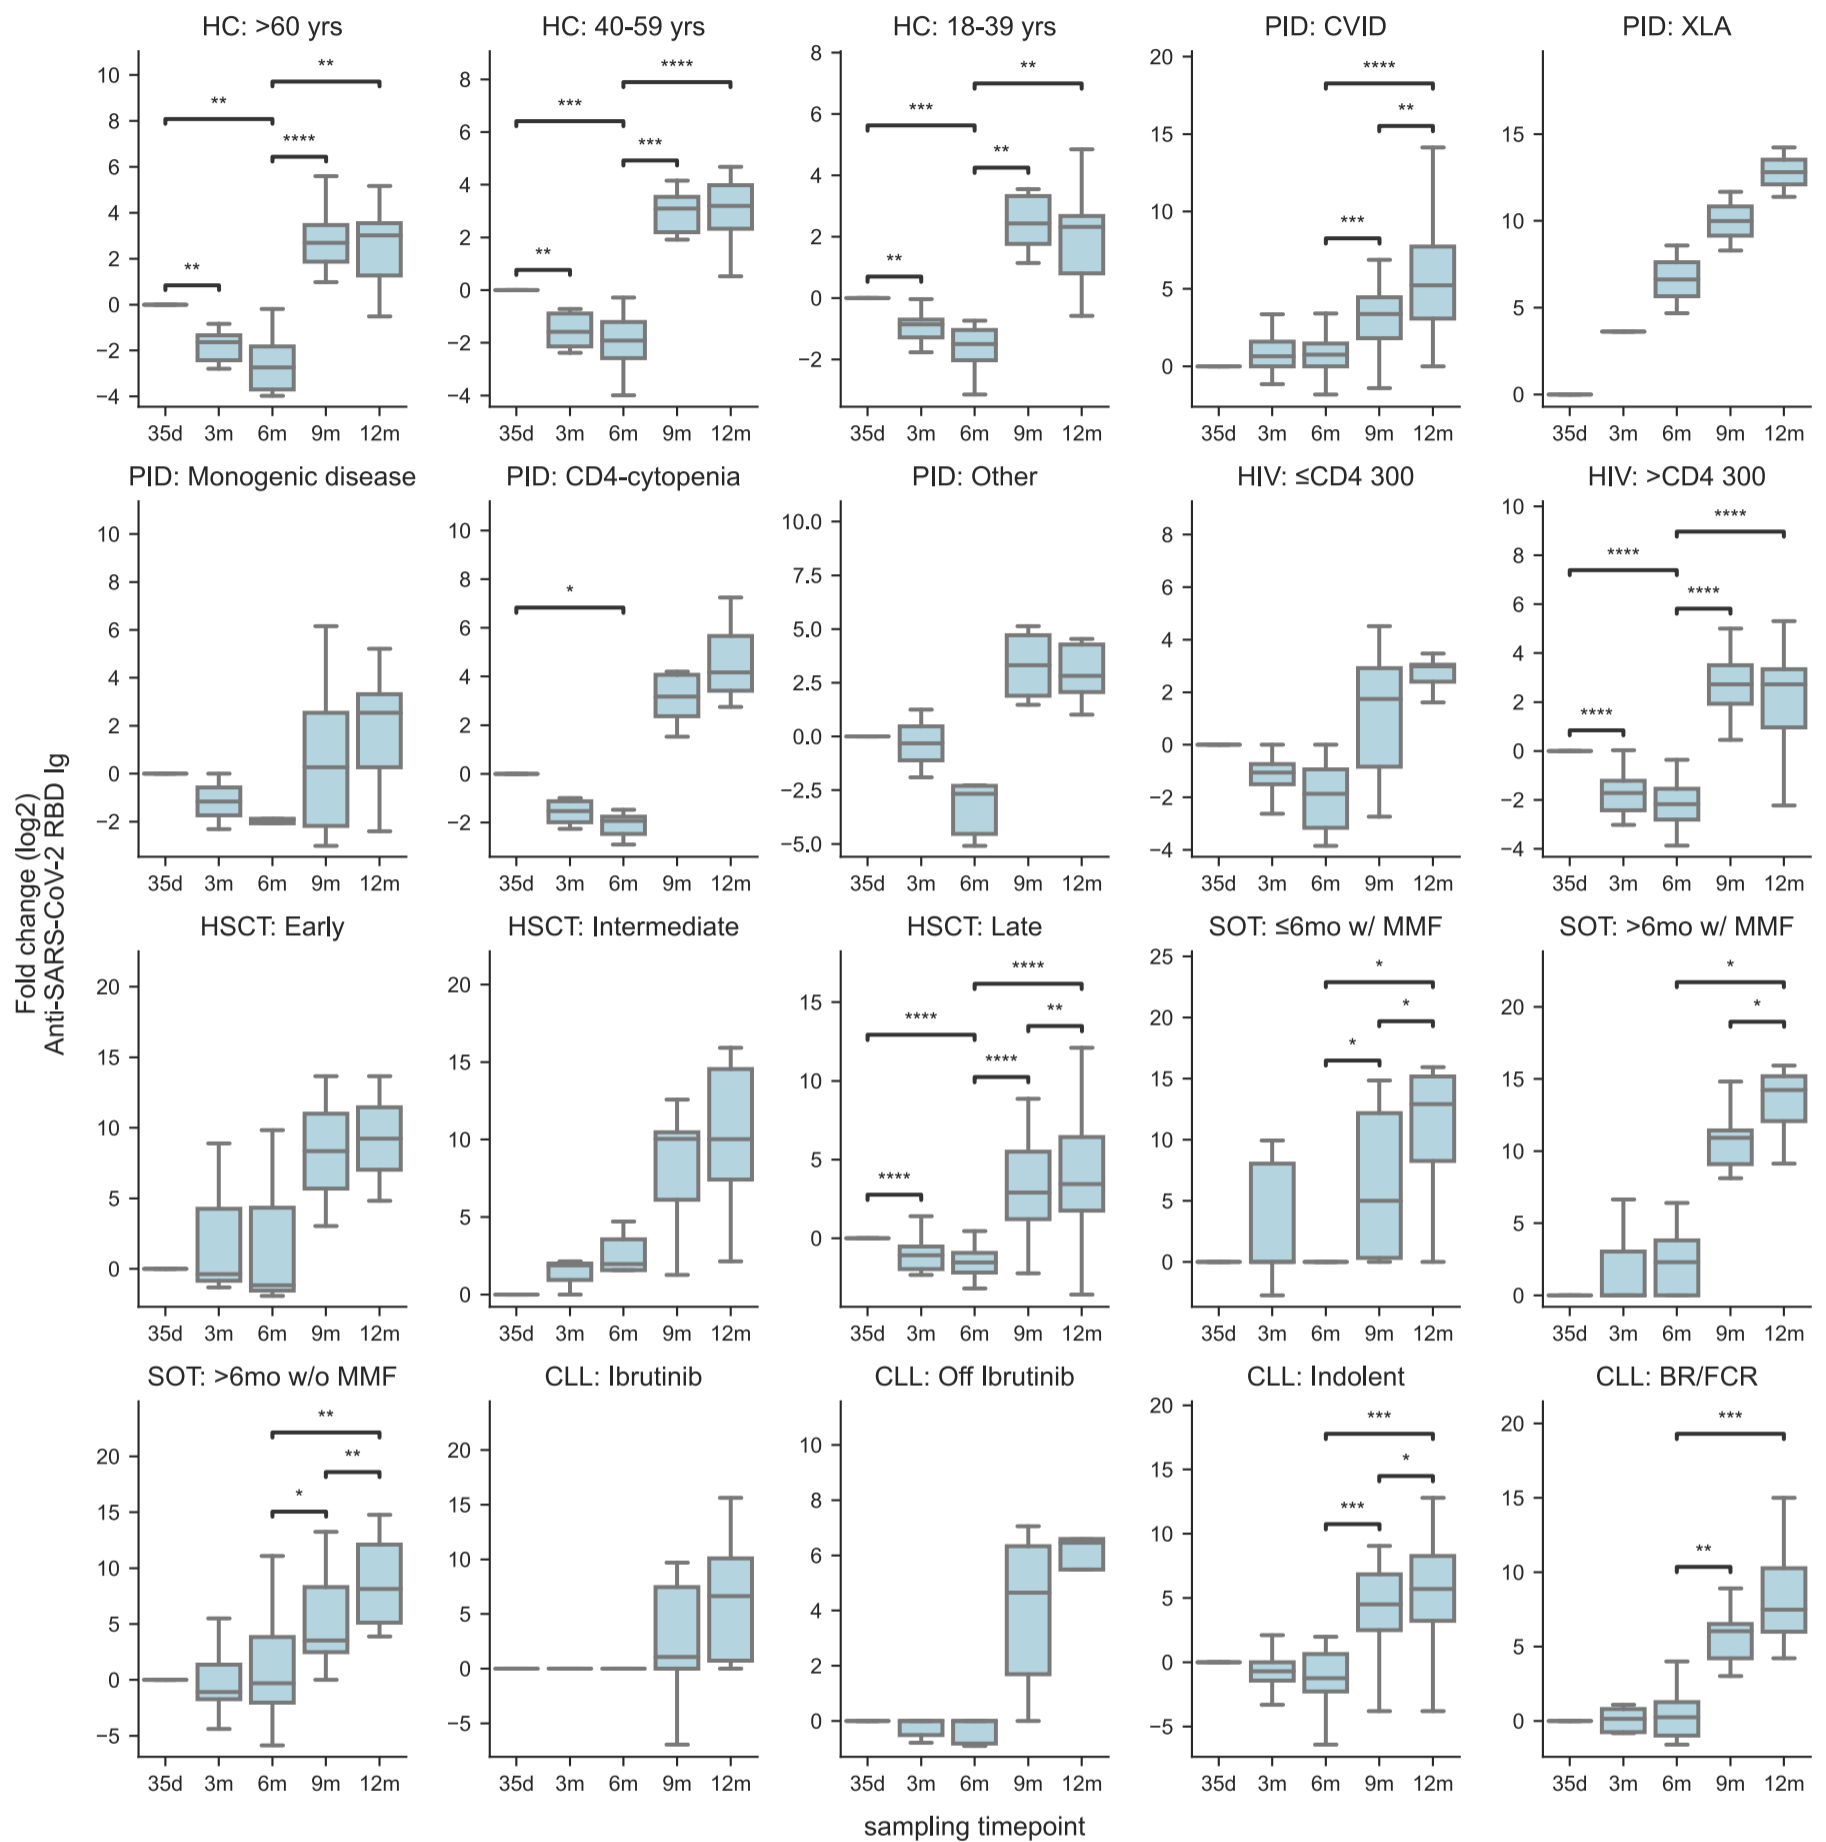

**Supplementary Figure S2. Subgroup-stratified dynamics of SARS-CoV-2 Wu-Hu.1 Ab titres.** Fold change of Spike-RBD titres at each timepoint at a subgroup level. Values are normalized to the day 35-timepoint. Statistical tests were performed on paired Spike-RBD titres using Wilcoxon, and Bonferroni correction for multiple comparisons. The star annotation (\*) indicates statistical significance at a p-value threshold of 0.05 (or \*\* for  $p < 0.01$ , \*\*\* for  $p < 0.001$ , \*\*\*\* for  $p < 0.0001$ ). For sample sizes, please see Table 1. Whiskers for all boxplots represents 1.5x IQR.

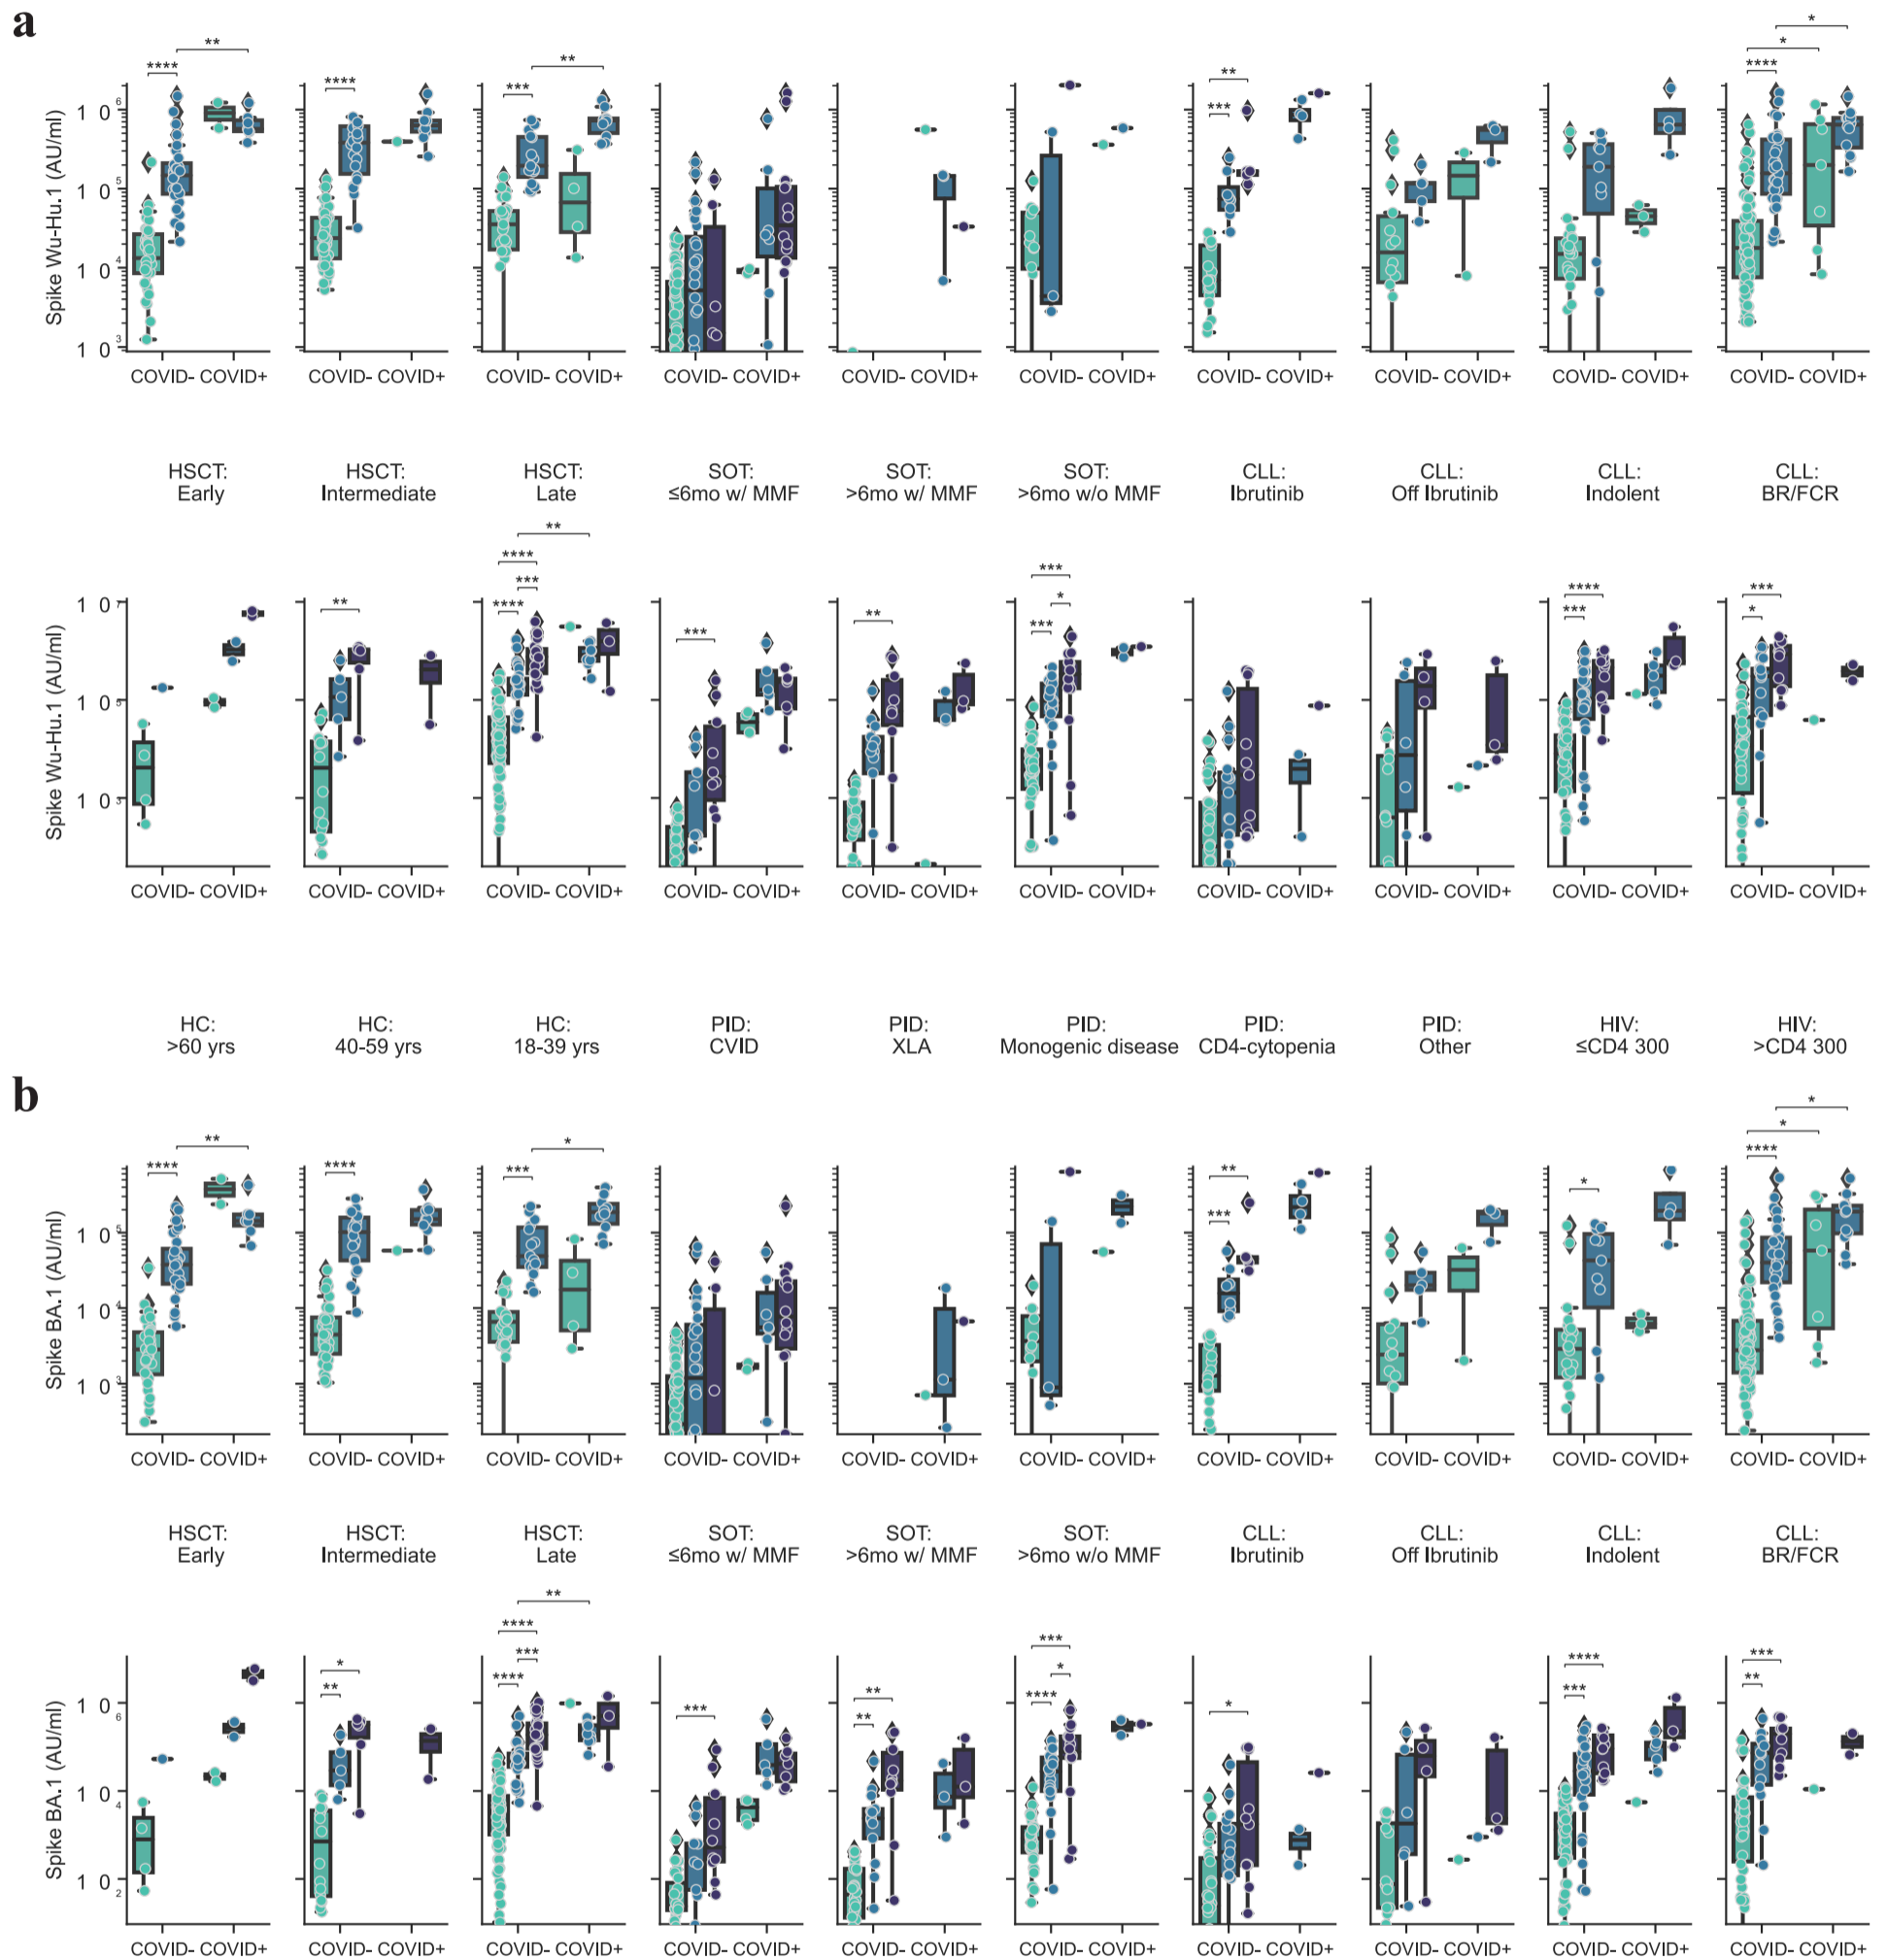

**Supplementary Figure S3. Comparison of Ab titres between subgroups.** Box plot showing (A) Spike Wu-Hu.1 and (B) Spike BA.1 Ab titres, stratified based on COVID-19 status as defined by prior positive COVID-19 test (PCR/RAT) and/or Nucleocapsid Ab titres >5,000 AU/ml in each patient subgroup. Statistical tests performed were Mann-Whitney with Bonferroni correction for multiple comparisons. The star annotation (\*) indicates statistical significance at a p-value threshold of 0.05 (or \*\* for  $p < 0.01$ , \*\*\* for  $p < 0.001$ , \*\*\*\* for  $p < 0.0001$ ). For sample sizes, please see Table 1. Whiskers for all boxplots represents 1.5x IQR.

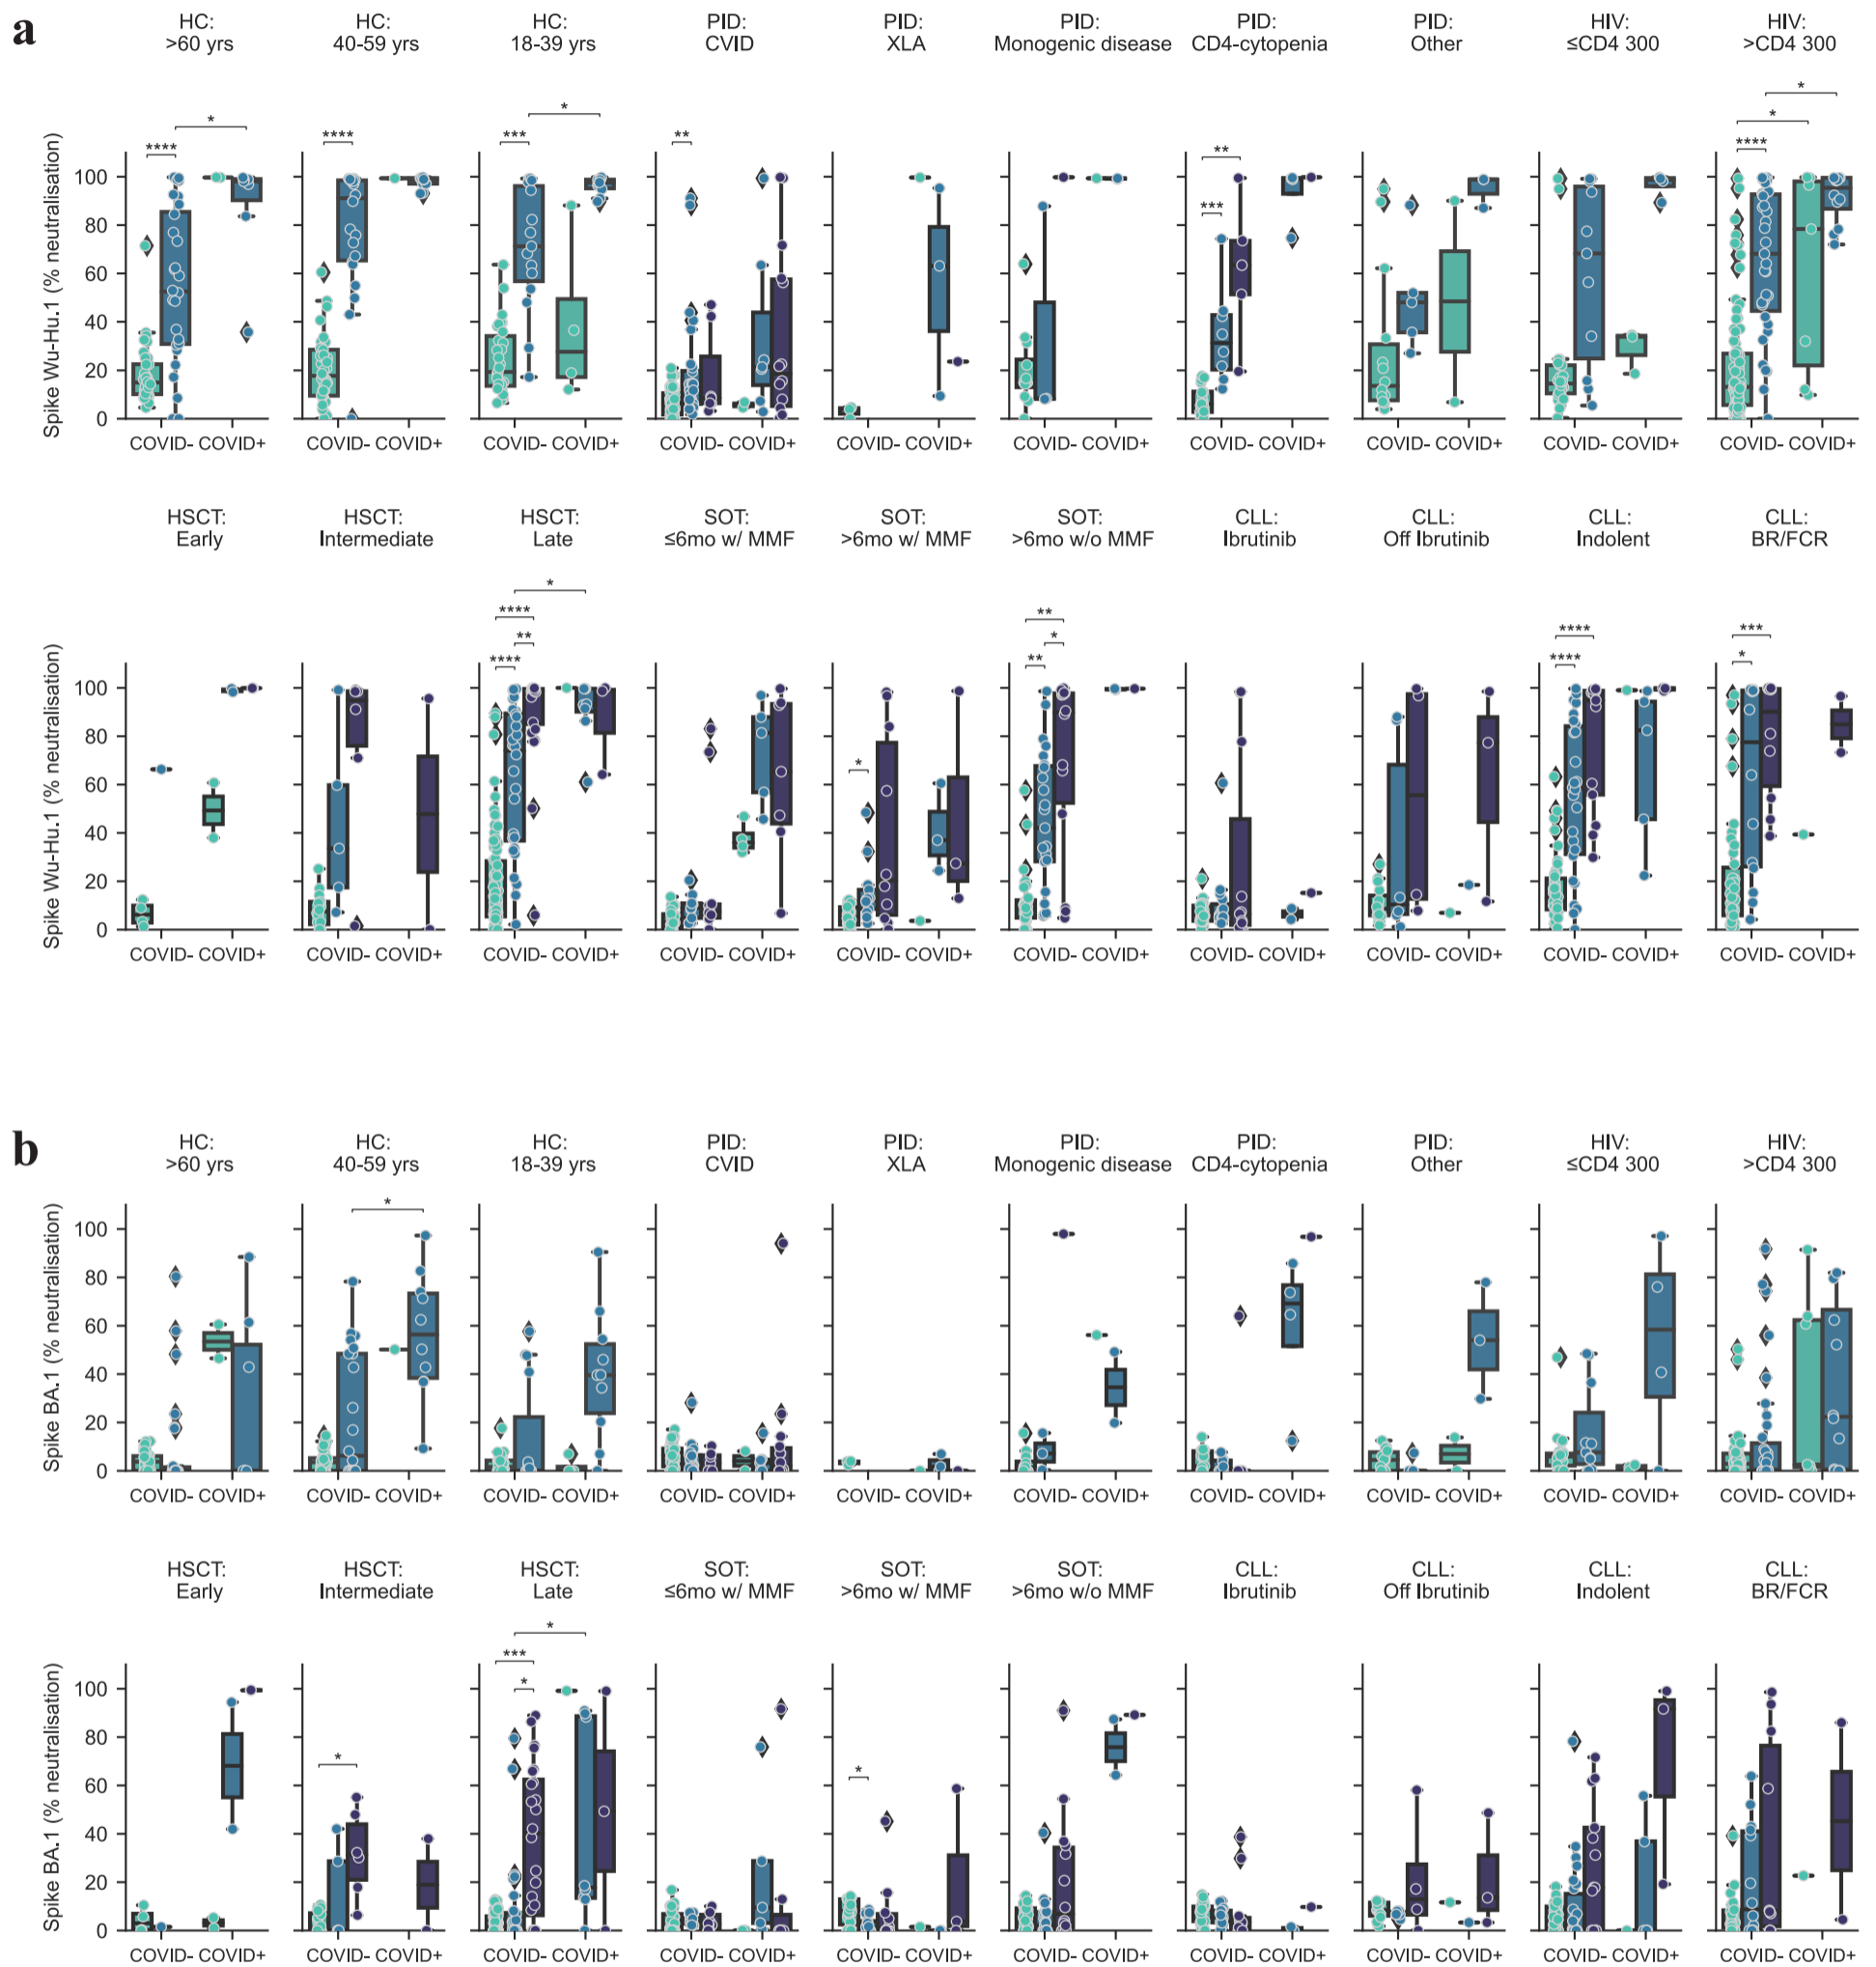

**Supplementary Figure S4. Comparison of Spike neutralisation between subgroups.** Box plot showing Ab neutralisation against Wu-Hu.1 (A) and BA.1 (B), stratified based on COVID-19 status as defined by prior positive COVID-19 test (PCR/RAT) and/or Nucleocapsid Ab titres >5,000 AU/ml in each patient subgroup. Statistical tests performed were Mann-Whitney with Bonferroni correction for multiple comparisons. The star annotation (\*) indicates statistical significance at a p-value threshold of 0.05 (or \*\* for  $p < 0.01$ , \*\*\* for  $p < 0.001$ , \*\*\*\* for  $p < 0.0001$ ). For sample sizes, please see Table 1. Whiskers for all boxplots represents 1.5x IQR.

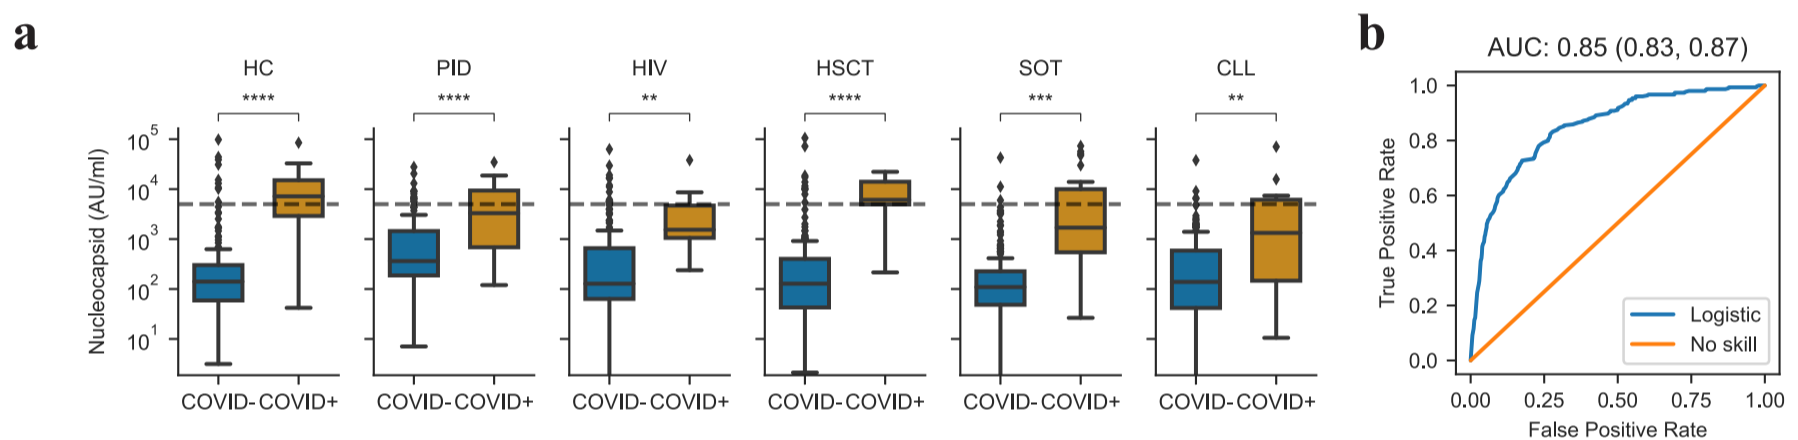

**Supplementary Figure S5. Nucleocapsid titres in verified and unverified COVID-19 cases. (a)** Box plot showing Nucleocapsid Ab titres stratified based on verified COVID-19 diagnosis in healthy controls and patient groups. The dotted line represents the cut-off value for COVID-19 positive (not PCR or rapid antigen test) determined by Nucleocapsid titre levels, as provided by MSD. Statistical tests were performed using Mann-Whitney U test. **(b)** Receiver operator characteristics of Nucleocapsid and COVID-19 diagnosis. The ROC curve was generated using sensitivity and specificity values calculated at different cut-off values using logistic regression, with the area under the curve (AUC, 95% CI) indicating the overall diagnostic performance. The star annotation (\*) indicates statistical significance at a p-value threshold of 0.05 (or \*\* for  $p < 0.01$ , \*\*\* for  $p < 0.001$ , \*\*\*\* for  $p < 0.0001$ ). For sample sizes, please see Table 1. Whiskers for all boxplots represents 1.5x IQR.

| Figure | Group | Variant | Comparison A      | Comparison B      | p-value |
|--------|-------|---------|-------------------|-------------------|---------|
| Fig 1b | HC    | WuHu.1  | 35d               | 3m                | <0.0001 |
| Fig 1b | HC    | WuHu.1  | 35d               | 6m                | <0.0001 |
| Fig 1b | HC    | WuHu.1  | 6m                | 9m                | <0.0001 |
| Fig 1b | HC    | WuHu.1  | 6m                | 12m               | <0.0001 |
| Fig 1b | HC    | WuHu.1  | 9m                | 12m               | 1.00    |
| Fig 1b | PID   | WuHu.1  | 35d               | 3m                | 1.00    |
| Fig 1b | PID   | WuHu.1  | 35d               | 6m                | 0.056   |
| Fig 1b | PID   | WuHu.1  | 6m                | 9m                | <0.0001 |
| Fig 1b | PID   | WuHu.1  | 6m                | 12m               | <0.0001 |
| Fig 1b | PID   | WuHu.1  | 9m                | 12m               | 0.0028  |
| Fig 1b | HIV   | WuHu.1  | 35d               | 3m                | <0.0001 |
| Fig 1b | HIV   | WuHu.1  | 35d               | 6m                | <0.0001 |
| Fig 1b | HIV   | WuHu.1  | 6m                | 9m                | <0.0001 |
| Fig 1b | HIV   | WuHu.1  | 6m                | 12m               | <0.0001 |
| Fig 1b | HIV   | WuHu.1  | 9m                | 12m               | 0.64    |
| Fig 1b | HSCT  | WuHu.1  | 35d               | 3m                | 0.0017  |
| Fig 1b | HSCT  | WuHu.1  | 35d               | 6m                | <0.0001 |
| Fig 1b | HSCT  | WuHu.1  | 6m                | 9m                | <0.0001 |
| Fig 1b | HSCT  | WuHu.1  | 6m                | 12m               | <0.0001 |
| Fig 1b | HSCT  | WuHu.1  | 9m                | 12m               | 0.0002  |
| Fig 1b | SOT   | WuHu.1  | 35d               | 3m                | 1.00    |
| Fig 1b | SOT   | WuHu.1  | 35d               | 6m                | 1.00    |
| Fig 1b | SOT   | WuHu.1  | 6m                | 9m                | <0.0001 |
| Fig 1b | SOT   | WuHu.1  | 6m                | 12m               | <0.0001 |
| Fig 1b | SOT   | WuHu.1  | 9m                | 12m               | <0.0001 |
| Fig 1b | CLL   | WuHu.1  | 35d               | 3m                | 0.51    |
| Fig 1b | CLL   | WuHu.1  | 35d               | 6m                | 1.00    |
| Fig 1b | CLL   | WuHu.1  | 6m                | 9m                | <0.0001 |
| Fig 1b | CLL   | WuHu.1  | 6m                | 12m               | <0.0001 |
| Fig 1b | CLL   | WuHu.1  | 9m                | 12m               | <0.0001 |
| Fig 2a | HC    | WuHu.1  | (COVID-, 2 doses) | (COVID-, 3 doses) | <0.0001 |
| Fig 2a | HC    | WuHu.1  | (COVID+, 2 doses) | (COVID+, 3 doses) | 0.30    |
| Fig 2a | HC    | WuHu.1  | (COVID-, 2 doses) | (COVID+, 2 doses) | 0.0013  |
| Fig 2a | HC    | WuHu.1  | (COVID-, 3 doses) | (COVID+, 3 doses) | <0.0001 |
| Fig 2a | PID   | WuHu.1  | (COVID-, 2 doses) | (COVID-, 3 doses) | 0.022   |
| Fig 2a | PID   | WuHu.1  | (COVID-, 2 doses) | (COVID-, 4 doses) | 0.16    |
| Fig 2a | PID   | WuHu.1  | (COVID-, 3 doses) | (COVID-, 4 doses) | 1.00    |
| Fig 2a | PID   | WuHu.1  | (COVID+, 2 doses) | (COVID+, 3 doses) | 1.00    |
| Fig 2a | PID   | WuHu.1  | (COVID+, 2 doses) | (COVID+, 4 doses) | 1.00    |
| Fig 2a | PID   | WuHu.1  | (COVID+, 3 doses) | (COVID+, 4 doses) | 1.00    |
| Fig 2a | PID   | WuHu.1  | (COVID-, 2 doses) | (COVID+, 2 doses) | 0.041   |
| Fig 2a | PID   | WuHu.1  | (COVID-, 3 doses) | (COVID+, 3 doses) | 0.027   |
| Fig 2a | PID   | WuHu.1  | (COVID-, 4 doses) | (COVID+, 4 doses) | 1.00    |
| Fig 2a | HIV   | WuHu.1  | (COVID-, 2 doses) | (COVID-, 3 doses) | <0.0001 |
| Fig 2a | HIV   | WuHu.1  | (COVID+, 2 doses) | (COVID+, 3 doses) | 0.23    |
| Fig 2a | HIV   | WuHu.1  | (COVID-, 2 doses) | (COVID+, 2 doses) | 0.013   |
| Fig 2a | HIV   | WuHu.1  | (COVID-, 3 doses) | (COVID+, 3 doses) | 0.0034  |
| Fig 2a | HSCT  | WuHu.1  | (COVID-, 2 doses) | (COVID-, 3 doses) | <0.0001 |
| Fig 2a | HSCT  | WuHu.1  | (COVID-, 2 doses) | (COVID-, 4 doses) | <0.0001 |
| Fig 2a | HSCT  | WuHu.1  | (COVID-, 3 doses) | (COVID-, 4 doses) | 0.0002  |
| Fig 2a | HSCT  | WuHu.1  | (COVID+, 2 doses) | (COVID+, 3 doses) | 1.00    |
| Fig 2a | HSCT  | WuHu.1  | (COVID+, 2 doses) | (COVID+, 4 doses) | 1.00    |
| Fig 2a | HSCT  | WuHu.1  | (COVID+, 3 doses) | (COVID+, 4 doses) | 1.00    |
| Fig 2a | HSCT  | WuHu.1  | (COVID-, 2 doses) | (COVID+, 2 doses) | 0.16    |



|        |      |        |                   |                   |         |
|--------|------|--------|-------------------|-------------------|---------|
| Fig 2a | HSCT | WuHu.1 | (COVID-, 3 doses) | (COVID+, 3 doses) | 0·0008  |
| Fig 2a | HSCT | WuHu.1 | (COVID-, 4 doses) | (COVID+, 4 doses) | 1·00    |
| Fig 2a | SOT  | WuHu.1 | (COVID-, 2 doses) | (COVID-, 3 doses) | <0·0001 |
| Fig 2a | SOT  | WuHu.1 | (COVID-, 2 doses) | (COVID-, 4 doses) | <0·0001 |
| Fig 2a | SOT  | WuHu.1 | (COVID-, 3 doses) | (COVID-, 4 doses) | 0·074   |
| Fig 2a | SOT  | WuHu.1 | (COVID+, 2 doses) | (COVID+, 3 doses) | 0·33    |
| Fig 2a | SOT  | WuHu.1 | (COVID+, 2 doses) | (COVID+, 4 doses) | 0·25    |
| Fig 2a | SOT  | WuHu.1 | (COVID+, 3 doses) | (COVID+, 4 doses) | 1·00    |
| Fig 2a | SOT  | WuHu.1 | (COVID-, 2 doses) | (COVID+, 2 doses) | 1·00    |
| Fig 2a | SOT  | WuHu.1 | (COVID-, 3 doses) | (COVID+, 3 doses) | 0·042   |
| Fig 2a | SOT  | WuHu.1 | (COVID-, 4 doses) | (COVID+, 4 doses) | 1·00    |
| Fig 2a | CLL  | WuHu.1 | (COVID-, 2 doses) | (COVID-, 3 doses) | 0·0001  |
| Fig 2a | CLL  | WuHu.1 | (COVID-, 2 doses) | (COVID-, 4 doses) | <0·0001 |
| Fig 2a | CLL  | WuHu.1 | (COVID-, 3 doses) | (COVID-, 4 doses) | 0·12    |
| Fig 2a | CLL  | WuHu.1 | (COVID+, 2 doses) | (COVID+, 3 doses) | 1·00    |
| Fig 2a | CLL  | WuHu.1 | (COVID+, 2 doses) | (COVID+, 4 doses) | 1·00    |
| Fig 2a | CLL  | WuHu.1 | (COVID+, 3 doses) | (COVID+, 4 doses) | 1·00    |
| Fig 2a | CLL  | WuHu.1 | (COVID-, 2 doses) | (COVID+, 2 doses) | 1·00    |
| Fig 2a | CLL  | WuHu.1 | (COVID-, 3 doses) | (COVID+, 3 doses) | 1·00    |
| Fig 2a | CLL  | WuHu.1 | (COVID-, 4 doses) | (COVID+, 4 doses) | 1·00    |
| Fig 3c | HC   | WuHu.1 | (COVID-, 2 doses) | (COVID-, 3 doses) | <0·0001 |
| Fig 3c | HC   | WuHu.1 | (COVID+, 2 doses) | (COVID+, 3 doses) | 1·00    |
| Fig 3c | HC   | WuHu.1 | (COVID-, 2 doses) | (COVID+, 2 doses) | 0·0040  |
| Fig 3c | HC   | WuHu.1 | (COVID-, 3 doses) | (COVID+, 3 doses) | 0·0002  |
| Fig 3c | PID  | WuHu.1 | (COVID-, 2 doses) | (COVID-, 3 doses) | 0·0015  |
| Fig 3c | PID  | WuHu.1 | (COVID-, 2 doses) | (COVID-, 4 doses) | 0·024   |
| Fig 3c | PID  | WuHu.1 | (COVID-, 3 doses) | (COVID-, 4 doses) | 1·00    |
| Fig 3c | PID  | WuHu.1 | (COVID+, 2 doses) | (COVID+, 3 doses) | 1·00    |
| Fig 3c | PID  | WuHu.1 | (COVID+, 2 doses) | (COVID+, 4 doses) | 1·00    |
| Fig 3c | PID  | WuHu.1 | (COVID+, 3 doses) | (COVID+, 4 doses) | 1·00    |
| Fig 3c | PID  | WuHu.1 | (COVID-, 2 doses) | (COVID+, 2 doses) | 0·57    |
| Fig 3c | PID  | WuHu.1 | (COVID-, 3 doses) | (COVID+, 3 doses) | 0·064   |
| Fig 3c | PID  | WuHu.1 | (COVID-, 4 doses) | (COVID+, 4 doses) | 1·00    |
| Fig 3c | HIV  | WuHu.1 | (COVID-, 2 doses) | (COVID-, 3 doses) | <0·0001 |
| Fig 3c | HIV  | WuHu.1 | (COVID+, 2 doses) | (COVID+, 3 doses) | 0·73    |
| Fig 3c | HIV  | WuHu.1 | (COVID-, 2 doses) | (COVID+, 2 doses) | 0·0018  |
| Fig 3c | HIV  | WuHu.1 | (COVID-, 3 doses) | (COVID+, 3 doses) | 0·0036  |
| Fig 3c | HSCT | WuHu.1 | (COVID-, 2 doses) | (COVID-, 3 doses) | <0·0001 |
| Fig 3c | HSCT | WuHu.1 | (COVID-, 2 doses) | (COVID-, 4 doses) | <0·0001 |
| Fig 3c | HSCT | WuHu.1 | (COVID-, 3 doses) | (COVID-, 4 doses) | 0·0013  |
| Fig 3c | HSCT | WuHu.1 | (COVID+, 2 doses) | (COVID+, 3 doses) | 1·00    |
| Fig 3c | HSCT | WuHu.1 | (COVID+, 2 doses) | (COVID+, 4 doses) | 1·00    |
| Fig 3c | HSCT | WuHu.1 | (COVID+, 3 doses) | (COVID+, 4 doses) | 1·00    |
| Fig 3c | HSCT | WuHu.1 | (COVID-, 2 doses) | (COVID+, 2 doses) | 0·068   |
| Fig 3c | HSCT | WuHu.1 | (COVID-, 3 doses) | (COVID+, 3 doses) | 0·0087  |
| Fig 3c | HSCT | WuHu.1 | (COVID-, 4 doses) | (COVID+, 4 doses) | 1·00    |
| Fig 3c | SOT  | WuHu.1 | (COVID-, 2 doses) | (COVID-, 3 doses) | <0·0001 |
| Fig 3c | SOT  | WuHu.1 | (COVID-, 2 doses) | (COVID-, 4 doses) | <0·0001 |
| Fig 3c | SOT  | WuHu.1 | (COVID-, 3 doses) | (COVID-, 4 doses) | 0·75    |
| Fig 3c | SOT  | WuHu.1 | (COVID+, 2 doses) | (COVID+, 3 doses) | 0·30    |
| Fig 3c | SOT  | WuHu.1 | (COVID+, 2 doses) | (COVID+, 4 doses) | 1·00    |
| Fig 3c | SOT  | WuHu.1 | (COVID+, 3 doses) | (COVID+, 4 doses) | 1·00    |
| Fig 3c | SOT  | WuHu.1 | (COVID-, 2 doses) | (COVID+, 2 doses) | 0·35    |
| Fig 3c | SOT  | WuHu.1 | (COVID-, 3 doses) | (COVID+, 3 doses) | 0·0066  |
| Fig 3c | SOT  | WuHu.1 | (COVID-, 4 doses) | (COVID+, 4 doses) | 1·00    |
| Fig 3c | CLL  | WuHu.1 | (COVID-, 2 doses) | (COVID-, 3 doses) | <0·0001 |
| Fig 3c | CLL  | WuHu.1 | (COVID-, 2 doses) | (COVID-, 4 doses) | <0·0001 |

|        |      |         |                   |                   |         |
|--------|------|---------|-------------------|-------------------|---------|
| Fig 3c | CLL  | WuHu.1  | (COVID-, 3 doses) | (COVID-, 4 doses) | 0.33    |
| Fig 3c | CLL  | WuHu.1  | (COVID+, 2 doses) | (COVID+, 3 doses) | 1.00    |
| Fig 3c | CLL  | WuHu.1  | (COVID+, 2 doses) | (COVID+, 4 doses) | 1.00    |
| Fig 3c | CLL  | WuHu.1  | (COVID+, 3 doses) | (COVID+, 4 doses) | 1.00    |
| Fig 3c | CLL  | WuHu.1  | (COVID-, 2 doses) | (COVID+, 2 doses) | 0.16    |
| Fig 3c | CLL  | WuHu.1  | (COVID-, 3 doses) | (COVID+, 3 doses) | 1.00    |
| Fig 3c | CLL  | WuHu.1  | (COVID-, 4 doses) | (COVID+, 4 doses) | 1.00    |
| Fig 3c | HC   | BA.1    | (COVID-, 2 doses) | (COVID-, 3 doses) | 1.00    |
| Fig 3c | HC   | BA.1    | (COVID+, 2 doses) | (COVID+, 3 doses) | 1.00    |
| Fig 3c | HC   | BA.1    | (COVID-, 2 doses) | (COVID+, 2 doses) | 1.00    |
| Fig 3c | HC   | BA.1    | (COVID-, 3 doses) | (COVID+, 3 doses) | 0.0023  |
| Fig 3c | PID  | BA.1    | (COVID-, 2 doses) | (COVID-, 3 doses) | 0.14    |
| Fig 3c | PID  | BA.1    | (COVID-, 2 doses) | (COVID-, 4 doses) | 1.00    |
| Fig 3c | PID  | BA.1    | (COVID-, 3 doses) | (COVID-, 4 doses) | 1.00    |
| Fig 3c | PID  | BA.1    | (COVID+, 2 doses) | (COVID+, 3 doses) | 1.00    |
| Fig 3c | PID  | BA.1    | (COVID+, 2 doses) | (COVID+, 4 doses) | 1.00    |
| Fig 3c | PID  | BA.1    | (COVID+, 3 doses) | (COVID+, 4 doses) | 1.00    |
| Fig 3c | PID  | BA.1    | (COVID-, 2 doses) | (COVID+, 2 doses) | 1.00    |
| Fig 3c | PID  | BA.1    | (COVID-, 3 doses) | (COVID+, 3 doses) | 0.15    |
| Fig 3c | PID  | BA.1    | (COVID-, 4 doses) | (COVID+, 4 doses) | 1.00    |
| Fig 3c | HIV  | BA.1    | (COVID-, 2 doses) | (COVID-, 3 doses) | 0.87    |
| Fig 3c | HIV  | BA.1    | (COVID+, 2 doses) | (COVID+, 3 doses) | 1.00    |
| Fig 3c | HIV  | BA.1    | (COVID-, 2 doses) | (COVID+, 2 doses) | 1.00    |
| Fig 3c | HIV  | BA.1    | (COVID-, 3 doses) | (COVID+, 3 doses) | 0.23    |
| Fig 3c | HSCT | BA.1    | (COVID-, 2 doses) | (COVID-, 3 doses) | 1.00    |
| Fig 3c | HSCT | BA.1    | (COVID-, 2 doses) | (COVID-, 4 doses) | <0.0001 |
| Fig 3c | HSCT | BA.1    | (COVID-, 3 doses) | (COVID-, 4 doses) | 0.0038  |
| Fig 3c | HSCT | BA.1    | (COVID+, 2 doses) | (COVID+, 3 doses) | 1.00    |
| Fig 3c | HSCT | BA.1    | (COVID+, 2 doses) | (COVID+, 4 doses) | 1.00    |
| Fig 3c | HSCT | BA.1    | (COVID+, 3 doses) | (COVID+, 4 doses) | 1.00    |
| Fig 3c | HSCT | BA.1    | (COVID-, 2 doses) | (COVID+, 2 doses) | 1.00    |
| Fig 3c | HSCT | BA.1    | (COVID-, 3 doses) | (COVID+, 3 doses) | 0.0056  |
| Fig 3c | HSCT | BA.1    | (COVID-, 4 doses) | (COVID+, 4 doses) | 1.00    |
| Fig 3c | SOT  | BA.1    | (COVID-, 2 doses) | (COVID-, 3 doses) | 0.17    |
| Fig 3c | SOT  | BA.1    | (COVID-, 2 doses) | (COVID-, 4 doses) | 1.00    |
| Fig 3c | SOT  | BA.1    | (COVID-, 3 doses) | (COVID-, 4 doses) | 1.00    |
| Fig 3c | SOT  | BA.1    | (COVID+, 2 doses) | (COVID+, 3 doses) | 1.00    |
| Fig 3c | SOT  | BA.1    | (COVID+, 2 doses) | (COVID+, 4 doses) | 1.00    |
| Fig 3c | SOT  | BA.1    | (COVID+, 3 doses) | (COVID+, 4 doses) | 1.00    |
| Fig 3c | SOT  | BA.1    | (COVID-, 2 doses) | (COVID+, 2 doses) | 0.13    |
| Fig 3c | SOT  | BA.1    | (COVID-, 3 doses) | (COVID+, 3 doses) | 1.00    |
| Fig 3c | SOT  | BA.1    | (COVID-, 4 doses) | (COVID+, 4 doses) | 1.00    |
| Fig 3c | CLL  | BA.1    | (COVID-, 2 doses) | (COVID-, 3 doses) | 1.00    |
| Fig 3c | CLL  | BA.1    | (COVID-, 2 doses) | (COVID-, 4 doses) | 1.00    |
| Fig 3c | CLL  | BA.1    | (COVID-, 3 doses) | (COVID-, 4 doses) | 1.00    |
| Fig 3c | CLL  | BA.1    | (COVID+, 2 doses) | (COVID+, 3 doses) | 1.00    |
| Fig 3c | CLL  | BA.1    | (COVID+, 2 doses) | (COVID+, 4 doses) | 0.56    |
| Fig 3c | CLL  | BA.1    | (COVID+, 3 doses) | (COVID+, 4 doses) | 0.16    |
| Fig 3c | CLL  | BA.1    | (COVID-, 2 doses) | (COVID+, 2 doses) | 1.00    |
| Fig 3c | CLL  | BA.1    | (COVID-, 3 doses) | (COVID+, 3 doses) | 1.00    |
| Fig 3c | CLL  | BA.1    | (COVID-, 4 doses) | (COVID+, 4 doses) | 0.76    |
| Fig 4a | HC   | Wu-Hu.1 | ('3m', COVID-)    | ('3m', COVID+)    | 1.00    |
| Fig 4a | HC   | Wu-Hu.1 | ('6m', COVID-)    | ('6m', COVID+)    | 1.00    |
| Fig 4a | HC   | Wu-Hu.1 | ('9m', COVID-)    | ('9m', COVID+)    | 1.00    |
| Fig 4a | PID  | Wu-Hu.1 | ('3m', COVID-)    | ('3m', COVID+)    | 1.00    |
| Fig 4a | PID  | Wu-Hu.1 | ('6m', COVID-)    | ('6m', COVID+)    | 1.00    |
| Fig 4a | PID  | Wu-Hu.1 | ('9m', COVID-)    | ('9m', COVID+)    | 1.00    |

|               |      |         |                |                |      |
|---------------|------|---------|----------------|----------------|------|
| <b>Fig 4a</b> | HIV  | Wu-Hu.1 | ('3m', COVID-) | ('3m', COVID+) | 1·00 |
| <b>Fig 4a</b> | HIV  | Wu-Hu.1 | ('6m', COVID-) | ('6m', COVID+) | 1·00 |
| <b>Fig 4a</b> | HIV  | Wu-Hu.1 | ('9m', COVID-) | ('9m', COVID+) | 1·00 |
| <b>Fig 4a</b> | HSCT | Wu-Hu.1 | ('3m', COVID-) | ('3m', COVID+) | 1·00 |
| <b>Fig 4a</b> | HSCT | Wu-Hu.1 | ('6m', COVID-) | ('6m', COVID+) | 1·00 |
| <b>Fig 4a</b> | HSCT | Wu-Hu.1 | ('9m', COVID-) | ('9m', COVID+) | 0·63 |
| <b>Fig 4a</b> | SOT  | Wu-Hu.1 | ('3m', COVID-) | ('3m', COVID+) | 0·82 |
| <b>Fig 4a</b> | SOT  | Wu-Hu.1 | ('6m', COVID-) | ('6m', COVID+) | 1·00 |
| <b>Fig 4a</b> | SOT  | Wu-Hu.1 | ('9m', COVID-) | ('9m', COVID+) | 0·64 |
| <b>Fig 4a</b> | CLL  | Wu-Hu.1 | ('3m', COVID-) | ('3m', COVID+) | 0·90 |
| <b>Fig 4a</b> | CLL  | Wu-Hu.1 | ('6m', COVID-) | ('6m', COVID+) | 0·40 |
| <b>Fig 4a</b> | CLL  | Wu-Hu.1 | ('9m', COVID-) | ('9m', COVID+) | 0·80 |
| <b>Fig 4a</b> | HC   | BA.1    | ('3m', COVID-) | ('3m', COVID+) | 1·00 |
| <b>Fig 4a</b> | HC   | BA.1    | ('6m', COVID-) | ('6m', COVID+) | 1·00 |
| <b>Fig 4a</b> | HC   | BA.1    | ('9m', COVID-) | ('9m', COVID+) | 1·00 |
| <b>Fig 4a</b> | PID  | BA.1    | ('3m', COVID-) | ('3m', COVID+) | 1·00 |
| <b>Fig 4a</b> | PID  | BA.1    | ('6m', COVID-) | ('6m', COVID+) | 1·00 |
| <b>Fig 4a</b> | PID  | BA.1    | ('9m', COVID-) | ('9m', COVID+) | 1·00 |
| <b>Fig 4a</b> | HIV  | BA.1    | ('3m', COVID-) | ('3m', COVID+) | 1·00 |
| <b>Fig 4a</b> | HIV  | BA.1    | ('6m', COVID-) | ('6m', COVID+) | 1·00 |
| <b>Fig 4a</b> | HIV  | BA.1    | ('9m', COVID-) | ('9m', COVID+) | 1·00 |
| <b>Fig 4a</b> | HSCT | BA.1    | ('3m', COVID-) | ('3m', COVID+) | 1·00 |
| <b>Fig 4a</b> | HSCT | BA.1    | ('6m', COVID-) | ('6m', COVID+) | 1·00 |
| <b>Fig 4a</b> | HSCT | BA.1    | ('9m', COVID-) | ('9m', COVID+) | 0·43 |
| <b>Fig 4a</b> | SOT  | BA.1    | ('3m', COVID-) | ('3m', COVID+) | 1·00 |
| <b>Fig 4a</b> | SOT  | BA.1    | ('6m', COVID-) | ('6m', COVID+) | 0·77 |
| <b>Fig 4a</b> | SOT  | BA.1    | ('9m', COVID-) | ('9m', COVID+) | 0·58 |
| <b>Fig 4a</b> | CLL  | BA.1    | ('3m', COVID-) | ('3m', COVID+) | 0·99 |
| <b>Fig 4a</b> | CLL  | BA.1    | ('6m', COVID-) | ('6m', COVID+) | 0·44 |
| <b>Fig 4a</b> | CLL  | BA.1    | ('9m', COVID-) | ('9m', COVID+) | 0·42 |

|                   |                        |         |     |     |         |
|-------------------|------------------------|---------|-----|-----|---------|
| <b>Supp Fig 2</b> | HC: >60 yrs            | Wu-Hu.1 | 35d | 3m  | 0·0049  |
| <b>Supp Fig 2</b> | HC: >60 yrs            | Wu-Hu.1 | 35d | 6m  | 0·0097  |
| <b>Supp Fig 2</b> | HC: >60 yrs            | Wu-Hu.1 | 6m  | 9m  | <0·0001 |
| <b>Supp Fig 2</b> | HC: >60 yrs            | Wu-Hu.1 | 6m  | 12m | 0·0010  |
| <b>Supp Fig 2</b> | HC: >60 yrs            | Wu-Hu.1 | 9m  | 12m | 1·00    |
| <b>Supp Fig 2</b> | HC: 40-59 yrs          | Wu-Hu.1 | 35d | 3m  | 0·0049  |
| <b>Supp Fig 2</b> | HC: 40-59 yrs          | Wu-Hu.1 | 35d | 6m  | 0·0002  |
| <b>Supp Fig 2</b> | HC: 40-59 yrs          | Wu-Hu.1 | 6m  | 9m  | 0·0004  |
| <b>Supp Fig 2</b> | HC: 40-59 yrs          | Wu-Hu.1 | 6m  | 12m | <0·0001 |
| <b>Supp Fig 2</b> | HC: 40-59 yrs          | Wu-Hu.1 | 9m  | 12m | 1·00    |
| <b>Supp Fig 2</b> | HC: 18-39 yrs          | Wu-Hu.1 | 35d | 3m  | 0·0049  |
| <b>Supp Fig 2</b> | HC: 18-39 yrs          | Wu-Hu.1 | 35d | 6m  | 0·0006  |
| <b>Supp Fig 2</b> | HC: 18-39 yrs          | Wu-Hu.1 | 6m  | 9m  | 0·0049  |
| <b>Supp Fig 2</b> | HC: 18-39 yrs          | Wu-Hu.1 | 6m  | 12m | 0·0024  |
| <b>Supp Fig 2</b> | HC: 18-39 yrs          | Wu-Hu.1 | 9m  | 12m | 0·87    |
| <b>Supp Fig 2</b> | PID: CVID              | Wu-Hu.1 | 35d | 3m  | 0·063   |
| <b>Supp Fig 2</b> | PID: CVID              | Wu-Hu.1 | 35d | 6m  | 0·75    |
| <b>Supp Fig 2</b> | PID: CVID              | Wu-Hu.1 | 6m  | 9m  | 0·0003  |
| <b>Supp Fig 2</b> | PID: CVID              | Wu-Hu.1 | 6m  | 12m | <0·0001 |
| <b>Supp Fig 2</b> | PID: CVID              | Wu-Hu.1 | 9m  | 12m | 0·0011  |
| <b>Supp Fig 2</b> | PID: XLA               | Wu-Hu.1 | 35d | 3m  | 1·00    |
| <b>Supp Fig 2</b> | PID: XLA               | Wu-Hu.1 | 35d | 6m  | 1·00    |
| <b>Supp Fig 2</b> | PID: XLA               | Wu-Hu.1 | 6m  | 9m  | 1·00    |
| <b>Supp Fig 2</b> | PID: XLA               | Wu-Hu.1 | 6m  | 12m | 1·00    |
| <b>Supp Fig 2</b> | PID: XLA               | Wu-Hu.1 | 9m  | 12m | 1·00    |
| <b>Supp Fig 2</b> | PID: Monogenic disease | Wu-Hu.1 | 35d | 3m  | 1·00    |
| <b>Supp Fig 2</b> | PID: Monogenic disease | Wu-Hu.1 | 35d | 6m  | 0·34    |

|            |                        |         |     |     |         |
|------------|------------------------|---------|-----|-----|---------|
| Supp Fig 2 | PID: Monogenic disease | Wu-Hu.1 | 6m  | 9m  | 1·00    |
| Supp Fig 2 | PID: Monogenic disease | Wu-Hu.1 | 6m  | 12m | 0·94    |
| Supp Fig 2 | PID: Monogenic disease | Wu-Hu.1 | 9m  | 12m | 1·00    |
| Supp Fig 2 | PID: CD4-cytopenia     | Wu-Hu.1 | 35d | 3m  | 0·62    |
| Supp Fig 2 | PID: CD4-cytopenia     | Wu-Hu.1 | 35d | 6m  | 0·039   |
| Supp Fig 2 | PID: CD4-cytopenia     | Wu-Hu.1 | 6m  | 9m  | 0·078   |
| Supp Fig 2 | PID: CD4-cytopenia     | Wu-Hu.1 | 6m  | 12m | 0·078   |
| Supp Fig 2 | PID: CD4-cytopenia     | Wu-Hu.1 | 9m  | 12m | 0·37    |
| Supp Fig 2 | PID: Other             | Wu-Hu.1 | 35d | 3m  | 1·00    |
| Supp Fig 2 | PID: Other             | Wu-Hu.1 | 35d | 6m  | 0·31    |
| Supp Fig 2 | PID: Other             | Wu-Hu.1 | 6m  | 9m  | 0·16    |
| Supp Fig 2 | PID: Other             | Wu-Hu.1 | 6m  | 12m | 0·16    |
| Supp Fig 2 | PID: Other             | Wu-Hu.1 | 9m  | 12m | 1·00    |
| Supp Fig 2 | HIV: ≤CD4 300          | Wu-Hu.1 | 35d | 3m  | 0·54    |
| Supp Fig 2 | HIV: ≤CD4 300          | Wu-Hu.1 | 35d | 6m  | 0·30    |
| Supp Fig 2 | HIV: ≤CD4 300          | Wu-Hu.1 | 6m  | 9m  | 0·25    |
| Supp Fig 2 | HIV: ≤CD4 300          | Wu-Hu.1 | 6m  | 12m | 0·059   |
| Supp Fig 2 | HIV: ≤CD4 300          | Wu-Hu.1 | 9m  | 12m | 1·00    |
| Supp Fig 2 | HIV: >CD4 300          | Wu-Hu.1 | 35d | 3m  | <0·0001 |
| Supp Fig 2 | HIV: >CD4 300          | Wu-Hu.1 | 35d | 6m  | <0·0001 |
| Supp Fig 2 | HIV: >CD4 300          | Wu-Hu.1 | 6m  | 9m  | <0·0001 |
| Supp Fig 2 | HIV: >CD4 300          | Wu-Hu.1 | 6m  | 12m | <0·0001 |
| Supp Fig 2 | HIV: >CD4 300          | Wu-Hu.1 | 9m  | 12m | 0·27    |
| Supp Fig 2 | HSCT: Early            | Wu-Hu.1 | 35d | 3m  | 1·00    |
| Supp Fig 2 | HSCT: Early            | Wu-Hu.1 | 35d | 6m  | 1·00    |
| Supp Fig 2 | HSCT: Early            | Wu-Hu.1 | 6m  | 9m  | 1·00    |
| Supp Fig 2 | HSCT: Early            | Wu-Hu.1 | 6m  | 12m | 1·00    |
| Supp Fig 2 | HSCT: Early            | Wu-Hu.1 | 9m  | 12m | 1·00    |
| Supp Fig 2 | HSCT: Intermediate     | Wu-Hu.1 | 35d | 3m  | 0·90    |
| Supp Fig 2 | HSCT: Intermediate     | Wu-Hu.1 | 35d | 6m  | 1·00    |
| Supp Fig 2 | HSCT: Intermediate     | Wu-Hu.1 | 6m  | 9m  | 0·31    |
| Supp Fig 2 | HSCT: Intermediate     | Wu-Hu.1 | 6m  | 12m | 0·31    |
| Supp Fig 2 | HSCT: Intermediate     | Wu-Hu.1 | 9m  | 12m | 0·14    |
| Supp Fig 2 | HSCT: Late             | Wu-Hu.1 | 35d | 3m  | <0·0001 |
| Supp Fig 2 | HSCT: Late             | Wu-Hu.1 | 35d | 6m  | <0·0001 |
| Supp Fig 2 | HSCT: Late             | Wu-Hu.1 | 6m  | 9m  | <0·0001 |
| Supp Fig 2 | HSCT: Late             | Wu-Hu.1 | 6m  | 12m | <0·0001 |
| Supp Fig 2 | HSCT: Late             | Wu-Hu.1 | 9m  | 12m | 0·0044  |
| Supp Fig 2 | SOT: ≤6mo w/ MMF       | Wu-Hu.1 | 35d | 3m  | 1·00    |
| Supp Fig 2 | SOT: ≤6mo w/ MMF       | Wu-Hu.1 | 35d | 6m  | 1·00    |
| Supp Fig 2 | SOT: ≤6mo w/ MMF       | Wu-Hu.1 | 6m  | 9m  | 0·038   |
| Supp Fig 2 | SOT: ≤6mo w/ MMF       | Wu-Hu.1 | 6m  | 12m | 0·038   |
| Supp Fig 2 | SOT: ≤6mo w/ MMF       | Wu-Hu.1 | 9m  | 12m | 0·025   |
| Supp Fig 2 | SOT: >6mo w/ MMF       | Wu-Hu.1 | 35d | 3m  | 0·34    |
| Supp Fig 2 | SOT: >6mo w/ MMF       | Wu-Hu.1 | 35d | 6m  | 0·090   |
| Supp Fig 2 | SOT: >6mo w/ MMF       | Wu-Hu.1 | 6m  | 9m  | 0·13    |
| Supp Fig 2 | SOT: >6mo w/ MMF       | Wu-Hu.1 | 6m  | 12m | 0·025   |
| Supp Fig 2 | SOT: >6mo w/ MMF       | Wu-Hu.1 | 9m  | 12m | 0·025   |
| Supp Fig 2 | SOT: >6mo w/o MMF      | Wu-Hu.1 | 35d | 3m  | 1·00    |
| Supp Fig 2 | SOT: >6mo w/o MMF      | Wu-Hu.1 | 35d | 6m  | 1·00    |
| Supp Fig 2 | SOT: >6mo w/o MMF      | Wu-Hu.1 | 6m  | 9m  | 0·015   |
| Supp Fig 2 | SOT: >6mo w/o MMF      | Wu-Hu.1 | 6m  | 12m | 0·0098  |
| Supp Fig 2 | SOT: >6mo w/o MMF      | Wu-Hu.1 | 9m  | 12m | 0·0049  |
| Supp Fig 2 | CLL: Ibrutinib         | Wu-Hu.1 | 35d | 3m  | 1·00    |
| Supp Fig 2 | CLL: Ibrutinib         | Wu-Hu.1 | 35d | 6m  | 1·00    |
| Supp Fig 2 | CLL: Ibrutinib         | Wu-Hu.1 | 6m  | 9m  | 0·090   |
| Supp Fig 2 | CLL: Ibrutinib         | Wu-Hu.1 | 6m  | 12m | 0·059   |
| Supp Fig 2 | CLL: Ibrutinib         | Wu-Hu.1 | 9m  | 12m | 0·059   |

|             |                    |         |                   |                   |         |
|-------------|--------------------|---------|-------------------|-------------------|---------|
| Supp Fig 2  | CLL: Off Ibrutinib | Wu-Hu.1 | 35d               | 3m                | 1·00    |
| Supp Fig 2  | CLL: Off Ibrutinib | Wu-Hu.1 | 35d               | 6m                | 1·00    |
| Supp Fig 2  | CLL: Off Ibrutinib | Wu-Hu.1 | 6m                | 9m                | 0·22    |
| Supp Fig 2  | CLL: Off Ibrutinib | Wu-Hu.1 | 6m                | 12m               | 0·22    |
| Supp Fig 2  | CLL: Off Ibrutinib | Wu-Hu.1 | 9m                | 12m               | 0·22    |
| Supp Fig 2  | CLL: Indolent      | Wu-Hu.1 | 35d               | 3m                | 1·00    |
| Supp Fig 2  | CLL: Indolent      | Wu-Hu.1 | 35d               | 6m                | 1·00    |
| Supp Fig 2  | CLL: Indolent      | Wu-Hu.1 | 6m                | 9m                | 0·0008  |
| Supp Fig 2  | CLL: Indolent      | Wu-Hu.1 | 6m                | 12m               | 0·0004  |
| Supp Fig 2  | CLL: Indolent      | Wu-Hu.1 | 9m                | 12m               | 0·018   |
| Supp Fig 2  | CLL: BR/FCR        | Wu-Hu.1 | 35d               | 3m                | 1·00    |
| Supp Fig 2  | CLL: BR/FCR        | Wu-Hu.1 | 35d               | 6m                | 1·00    |
| Supp Fig 2  | CLL: BR/FCR        | Wu-Hu.1 | 6m                | 9m                | 0·0061  |
| Supp Fig 2  | CLL: BR/FCR        | Wu-Hu.1 | 6m                | 12m               | 0·0006  |
| Supp Fig 2  | CLL: BR/FCR        | Wu-Hu.1 | 9m                | 12m               | 0·054   |
| Supp Fig 3a | HC: >60 yrs        | BA.1    | (COVID-, 2 doses) | (COVID-, 3 doses) | <0·0001 |
| Supp Fig 3a | HC: >60 yrs        | BA.1    | (COVID-, 3 doses) | (COVID+, 3 doses) | 0·0025  |
| Supp Fig 3a | HC: 40-59 yrs      | BA.1    | (COVID-, 2 doses) | (COVID-, 3 doses) | <0·0001 |
| Supp Fig 3a | HC: 40-59 yrs      | BA.1    | (COVID-, 3 doses) | (COVID+, 3 doses) | 0·11    |
| Supp Fig 3a | HC: 18-39 yrs      | BA.1    | (COVID-, 2 doses) | (COVID-, 3 doses) | 0·0001  |
| Supp Fig 3a | HC: 18-39 yrs      | BA.1    | (COVID-, 3 doses) | (COVID+, 3 doses) | 0·0049  |
| Supp Fig 3a | PID: CVID          | BA.1    | (COVID-, 2 doses) | (COVID-, 3 doses) | 0·20    |
| Supp Fig 3a | PID: CVID          | BA.1    | (COVID-, 2 doses) | (COVID-, 4 doses) | 1·00    |
| Supp Fig 3a | PID: CVID          | BA.1    | (COVID-, 3 doses) | (COVID-, 4 doses) | 1·00    |
| Supp Fig 3a | PID: CVID          | BA.1    | (COVID-, 3 doses) | (COVID+, 3 doses) | 0·63    |
| Supp Fig 3a | PID: CVID          | BA.1    | (COVID-, 4 doses) | (COVID+, 4 doses) | 0·40    |
| Supp Fig 3a | PID: CVID          | BA.1    | (COVID+, 3 doses) | (COVID+, 4 doses) | 1·00    |
| Supp Fig 3a | PID: CD4-cytopenia | BA.1    | (COVID-, 2 doses) | (COVID-, 3 doses) | 0·0005  |
| Supp Fig 3a | PID: CD4-cytopenia | BA.1    | (COVID-, 2 doses) | (COVID-, 4 doses) | 0·0030  |
| Supp Fig 3a | PID: CD4-cytopenia | BA.1    | (COVID-, 3 doses) | (COVID-, 4 doses) | 0·14    |
| Supp Fig 3a | HIV: ≤CD4 300      | BA.1    | (COVID-, 2 doses) | (COVID-, 3 doses) | 0·088   |
| Supp Fig 3a | HIV: >CD4 300      | BA.1    | (COVID-, 2 doses) | (COVID-, 3 doses) | <0·0001 |
| Supp Fig 3a | HIV: >CD4 300      | BA.1    | (COVID-, 2 doses) | (COVID+, 2 doses) | 0·044   |
| Supp Fig 3a | HIV: >CD4 300      | BA.1    | (COVID-, 3 doses) | (COVID+, 3 doses) | 0·047   |
| Supp Fig 3a | HIV: >CD4 300      | BA.1    | (COVID+, 2 doses) | (COVID+, 3 doses) | 1·00    |
| Supp Fig 3a | HSCT: Intermediate | BA.1    | (COVID-, 2 doses) | (COVID-, 3 doses) | 0·056   |
| Supp Fig 3a | HSCT: Intermediate | BA.1    | (COVID-, 2 doses) | (COVID-, 4 doses) | 0·0080  |
| Supp Fig 3a | HSCT: Intermediate | BA.1    | (COVID-, 3 doses) | (COVID-, 4 doses) | 0·25    |
| Supp Fig 3a | HSCT: Late         | BA.1    | (COVID-, 2 doses) | (COVID-, 3 doses) | <0·0001 |
| Supp Fig 3a | HSCT: Late         | BA.1    | (COVID-, 2 doses) | (COVID-, 4 doses) | <0·0001 |
| Supp Fig 3a | HSCT: Late         | BA.1    | (COVID-, 3 doses) | (COVID-, 4 doses) | 0·0006  |
| Supp Fig 3a | HSCT: Late         | BA.1    | (COVID-, 3 doses) | (COVID+, 3 doses) | 0·0042  |
| Supp Fig 3a | SOT: ≤6mo w/ MMF   | BA.1    | (COVID-, 2 doses) | (COVID-, 3 doses) | 0·068   |
| Supp Fig 3a | SOT: ≤6mo w/ MMF   | BA.1    | (COVID-, 2 doses) | (COVID-, 4 doses) | 0·0001  |
| Supp Fig 3a | SOT: ≤6mo w/ MMF   | BA.1    | (COVID-, 3 doses) | (COVID-, 4 doses) | 0·24    |
| Supp Fig 3a | SOT: ≤6mo w/ MMF   | BA.1    | (COVID-, 4 doses) | (COVID+, 4 doses) | 0·080   |
| Supp Fig 3a | SOT: >6mo w/ MMF   | BA.1    | (COVID-, 2 doses) | (COVID-, 3 doses) | 0·050   |
| Supp Fig 3a | SOT: >6mo w/ MMF   | BA.1    | (COVID-, 2 doses) | (COVID-, 4 doses) | 0·0018  |
| Supp Fig 3a | SOT: >6mo w/ MMF   | BA.1    | (COVID-, 3 doses) | (COVID-, 4 doses) | 0·082   |
| Supp Fig 3a | SOT: >6mo w/o MMF  | BA.1    | (COVID-, 2 doses) | (COVID-, 3 doses) | 0·0001  |
| Supp Fig 3a | SOT: >6mo w/o MMF  | BA.1    | (COVID-, 2 doses) | (COVID-, 4 doses) | 0·0004  |
| Supp Fig 3a | SOT: >6mo w/o MMF  | BA.1    | (COVID-, 3 doses) | (COVID-, 4 doses) | 0·017   |
| Supp Fig 3a | CLL: Ibrutinib     | BA.1    | (COVID-, 2 doses) | (COVID-, 3 doses) | 0·16    |
| Supp Fig 3a | CLL: Ibrutinib     | BA.1    | (COVID-, 2 doses) | (COVID-, 4 doses) | 0·051   |
| Supp Fig 3a | CLL: Ibrutinib     | BA.1    | (COVID-, 3 doses) | (COVID-, 4 doses) | 0·86    |
| Supp Fig 3a | CLL: Off Ibrutinib | BA.1    | (COVID-, 2 doses) | (COVID-, 3 doses) | 0·41    |
| Supp Fig 3a | CLL: Indolent      | BA.1    | (COVID-, 2 doses) | (COVID-, 3 doses) | 0·0002  |

|             |                    |         |                   |                   |         |
|-------------|--------------------|---------|-------------------|-------------------|---------|
| Supp Fig 3a | CLL: Indolent      | BA.1    | (COVID-, 2 doses) | (COVID-, 4 doses) | <0·0001 |
| Supp Fig 3a | CLL: Indolent      | BA.1    | (COVID-, 3 doses) | (COVID-, 4 doses) | 0·26    |
| Supp Fig 3a | CLL: Indolent      | BA.1    | (COVID-, 3 doses) | (COVID+, 3 doses) | 0·62    |
| Supp Fig 3a | CLL: BR/FCR        | BA.1    | (COVID-, 2 doses) | (COVID-, 3 doses) | 0·010   |
| Supp Fig 3a | CLL: BR/FCR        | BA.1    | (COVID-, 2 doses) | (COVID-, 4 doses) | 0·0002  |
| Supp Fig 3a | CLL: BR/FCR        | BA.1    | (COVID-, 3 doses) | (COVID-, 4 doses) | 0·13    |
| Supp Fig 3b | HC: >60 yrs        | BA.1    | (COVID-, 2 doses) | (COVID-, 3 doses) | <0·0001 |
| Supp Fig 3b | HC: >60 yrs        | BA.1    | (COVID-, 3 doses) | (COVID+, 3 doses) | 0·0050  |
| Supp Fig 3b | HC: 40-59 yrs      | BA.1    | (COVID-, 2 doses) | (COVID-, 3 doses) | <0·0001 |
| Supp Fig 3b | HC: 40-59 yrs      | BA.1    | (COVID-, 3 doses) | (COVID+, 3 doses) | 0·26    |
| Supp Fig 3b | HC: 18-39 yrs      | BA.1    | (COVID-, 2 doses) | (COVID-, 3 doses) | 0·0001  |
| Supp Fig 3b | HC: 18-39 yrs      | BA.1    | (COVID-, 3 doses) | (COVID+, 3 doses) | 0·016   |
| Supp Fig 3b | PID: CVID          | BA.1    | (COVID-, 2 doses) | (COVID-, 3 doses) | 0·19    |
| Supp Fig 3b | PID: CVID          | BA.1    | (COVID-, 2 doses) | (COVID-, 4 doses) | 1·00    |
| Supp Fig 3b | PID: CVID          | BA.1    | (COVID-, 3 doses) | (COVID-, 4 doses) | 1·00    |
| Supp Fig 3b | PID: CVID          | BA.1    | (COVID-, 3 doses) | (COVID+, 3 doses) | 0·51    |
| Supp Fig 3b | PID: CVID          | BA.1    | (COVID-, 4 doses) | (COVID+, 4 doses) | 0·28    |
| Supp Fig 3b | PID: CVID          | BA.1    | (COVID+, 3 doses) | (COVID+, 4 doses) | 1·00    |
| Supp Fig 3b | PID: CD4-cytopenia | BA.1    | (COVID-, 2 doses) | (COVID-, 3 doses) | 0·0005  |
| Supp Fig 3b | PID: CD4-cytopenia | BA.1    | (COVID-, 2 doses) | (COVID-, 4 doses) | 0·0030  |
| Supp Fig 3b | PID: CD4-cytopenia | BA.1    | (COVID-, 3 doses) | (COVID-, 4 doses) | 0·091   |
| Supp Fig 3b | HIV: ≤CD4 300      | BA.1    | (COVID-, 2 doses) | (COVID-, 3 doses) | 0·043   |
| Supp Fig 3b | HIV: >CD4 300      | BA.1    | (COVID-, 2 doses) | (COVID-, 3 doses) | <0·0001 |
| Supp Fig 3b | HIV: >CD4 300      | BA.1    | (COVID-, 2 doses) | (COVID+, 2 doses) | 0·023   |
| Supp Fig 3b | HIV: >CD4 300      | BA.1    | (COVID-, 3 doses) | (COVID+, 3 doses) | 0·023   |
| Supp Fig 3b | HIV: >CD4 300      | BA.1    | (COVID+, 2 doses) | (COVID+, 3 doses) | 1·00    |
| Supp Fig 3b | HSCT: Intermediate | BA.1    | (COVID-, 2 doses) | (COVID-, 3 doses) | 0·0047  |
| Supp Fig 3b | HSCT: Intermediate | BA.1    | (COVID-, 2 doses) | (COVID-, 4 doses) | 0·014   |
| Supp Fig 3b | HSCT: Intermediate | BA.1    | (COVID-, 3 doses) | (COVID-, 4 doses) | 0·38    |
| Supp Fig 3b | HSCT: Late         | BA.1    | (COVID-, 2 doses) | (COVID-, 3 doses) | <0·0001 |
| Supp Fig 3b | HSCT: Late         | BA.1    | (COVID-, 2 doses) | (COVID-, 4 doses) | <0·0001 |
| Supp Fig 3b | HSCT: Late         | BA.1    | (COVID-, 3 doses) | (COVID-, 4 doses) | 0·0003  |
| Supp Fig 3b | HSCT: Late         | BA.1    | (COVID-, 3 doses) | (COVID+, 3 doses) | 0·0032  |
| Supp Fig 3b | SOT: ≤6mo w/ MMF   | BA.1    | (COVID-, 2 doses) | (COVID-, 3 doses) | 0·080   |
| Supp Fig 3b | SOT: ≤6mo w/ MMF   | BA.1    | (COVID-, 2 doses) | (COVID-, 4 doses) | 0·0003  |
| Supp Fig 3b | SOT: ≤6mo w/ MMF   | BA.1    | (COVID-, 3 doses) | (COVID-, 4 doses) | 0·56    |
| Supp Fig 3b | SOT: ≤6mo w/ MMF   | BA.1    | (COVID-, 4 doses) | (COVID+, 4 doses) | 0·17    |
| Supp Fig 3b | SOT: >6mo w/ MMF   | BA.1    | (COVID-, 2 doses) | (COVID-, 3 doses) | 0·0019  |
| Supp Fig 3b | SOT: >6mo w/ MMF   | BA.1    | (COVID-, 2 doses) | (COVID-, 4 doses) | 0·0012  |
| Supp Fig 3b | SOT: >6mo w/ MMF   | BA.1    | (COVID-, 3 doses) | (COVID-, 4 doses) | 0·069   |
| Supp Fig 3b | SOT: >6mo w/o MMF  | BA.1    | (COVID-, 2 doses) | (COVID-, 3 doses) | <0·0001 |
| Supp Fig 3b | SOT: >6mo w/o MMF  | BA.1    | (COVID-, 2 doses) | (COVID-, 4 doses) | 0·0003  |
| Supp Fig 3b | SOT: >6mo w/o MMF  | BA.1    | (COVID-, 3 doses) | (COVID-, 4 doses) | 0·022   |
| Supp Fig 3b | CLL: Ibrutinib     | BA.1    | (COVID-, 2 doses) | (COVID-, 3 doses) | 0·074   |
| Supp Fig 3b | CLL: Ibrutinib     | BA.1    | (COVID-, 2 doses) | (COVID-, 4 doses) | 0·021   |
| Supp Fig 3b | CLL: Ibrutinib     | BA.1    | (COVID-, 3 doses) | (COVID-, 4 doses) | 1·00    |
| Supp Fig 3b | CLL: Off Ibrutinib | BA.1    | (COVID-, 2 doses) | (COVID-, 3 doses) | 0·18    |
| Supp Fig 3b | CLL: Indolent      | BA.1    | (COVID-, 2 doses) | (COVID-, 3 doses) | 0·0001  |
| Supp Fig 3b | CLL: Indolent      | BA.1    | (COVID-, 2 doses) | (COVID-, 4 doses) | <0·0001 |
| Supp Fig 3b | CLL: Indolent      | BA.1    | (COVID-, 3 doses) | (COVID-, 4 doses) | 0·32    |
| Supp Fig 3b | CLL: Indolent      | BA.1    | (COVID-, 3 doses) | (COVID+, 3 doses) | 0·55    |
| Supp Fig 3b | CLL: BR/FCR        | BA.1    | (COVID-, 2 doses) | (COVID-, 3 doses) | 0·0044  |
| Supp Fig 3b | CLL: BR/FCR        | BA.1    | (COVID-, 2 doses) | (COVID-, 4 doses) | 0·0002  |
| Supp Fig 3b | CLL: BR/FCR        | BA.1    | (COVID-, 3 doses) | (COVID-, 4 doses) | 0·18    |
| Supp Fig 4a | HC: >60 yrs        | Wu-Hu.1 | (COVID-, 2 doses) | (COVID-, 3 doses) | <0·0001 |
| Supp Fig 4a | HC: >60 yrs        | Wu-Hu.1 | (COVID-, 3 doses) | (COVID+, 3 doses) | 0·012   |
| Supp Fig 4a | HC: 40-59 yrs      | Wu-Hu.1 | (COVID-, 2 doses) | (COVID-, 3 doses) | <0·0001 |
| Supp Fig 4a | HC: 40-59 yrs      | Wu-Hu.1 | (COVID-, 3 doses) | (COVID+, 3 doses) | 0·16    |

|             |                    |         |                   |                   |         |
|-------------|--------------------|---------|-------------------|-------------------|---------|
| Supp Fig 4a | HC: 18-39 yrs      | Wu-Hu.1 | (COVID-, 2 doses) | (COVID-, 3 doses) | 0·0002  |
| Supp Fig 4a | HC: 18-39 yrs      | Wu-Hu.1 | (COVID-, 3 doses) | (COVID+, 3 doses) | 0·041   |
| Supp Fig 4a | PID: CVID          | Wu-Hu.1 | (COVID-, 2 doses) | (COVID-, 3 doses) | 0·0091  |
| Supp Fig 4a | PID: CVID          | Wu-Hu.1 | (COVID-, 2 doses) | (COVID-, 4 doses) | 0·61    |
| Supp Fig 4a | PID: CVID          | Wu-Hu.1 | (COVID-, 3 doses) | (COVID-, 4 doses) | 1·00    |
| Supp Fig 4a | PID: CVID          | Wu-Hu.1 | (COVID-, 3 doses) | (COVID+, 3 doses) | 1·00    |
| Supp Fig 4a | PID: CVID          | Wu-Hu.1 | (COVID-, 4 doses) | (COVID+, 4 doses) | 1·00    |
| Supp Fig 4a | PID: CVID          | Wu-Hu.1 | (COVID+, 3 doses) | (COVID+, 4 doses) | 1·00    |
| Supp Fig 4a | PID: CD4-cytopenia | Wu-Hu.1 | (COVID-, 2 doses) | (COVID-, 3 doses) | 0·0005  |
| Supp Fig 4a | PID: CD4-cytopenia | Wu-Hu.1 | (COVID-, 2 doses) | (COVID-, 4 doses) | 0·0030  |
| Supp Fig 4a | PID: CD4-cytopenia | Wu-Hu.1 | (COVID-, 3 doses) | (COVID-, 4 doses) | 0·61    |
| Supp Fig 4a | HIV: ≤CD4 300      | Wu-Hu.1 | (COVID-, 2 doses) | (COVID-, 3 doses) | 0·055   |
| Supp Fig 4a | HIV: >CD4 300      | Wu-Hu.1 | (COVID-, 2 doses) | (COVID-, 3 doses) | <0·0001 |
| Supp Fig 4a | HIV: >CD4 300      | Wu-Hu.1 | (COVID-, 2 doses) | (COVID+, 2 doses) | 0·023   |
| Supp Fig 4a | HIV: >CD4 300      | Wu-Hu.1 | (COVID-, 3 doses) | (COVID+, 3 doses) | 0·036   |
| Supp Fig 4a | HIV: >CD4 300      | Wu-Hu.1 | (COVID+, 2 doses) | (COVID+, 3 doses) | 1·00    |
| Supp Fig 4a | HSCT: Intermediate | Wu-Hu.1 | (COVID-, 2 doses) | (COVID-, 3 doses) | 0·056   |
| Supp Fig 4a | HSCT: Intermediate | Wu-Hu.1 | (COVID-, 2 doses) | (COVID-, 4 doses) | 0·088   |
| Supp Fig 4a | HSCT: Intermediate | Wu-Hu.1 | (COVID-, 3 doses) | (COVID-, 4 doses) | 0·99    |
| Supp Fig 4a | HSCT: Late         | Wu-Hu.1 | (COVID-, 2 doses) | (COVID-, 3 doses) | <0·0001 |
| Supp Fig 4a | HSCT: Late         | Wu-Hu.1 | (COVID-, 2 doses) | (COVID-, 4 doses) | <0·0001 |
| Supp Fig 4a | HSCT: Late         | Wu-Hu.1 | (COVID-, 3 doses) | (COVID-, 4 doses) | 0·0012  |
| Supp Fig 4a | HSCT: Late         | Wu-Hu.1 | (COVID-, 3 doses) | (COVID+, 3 doses) | 0·049   |
| Supp Fig 4a | SOT: ≤6mo w/ MMF   | Wu-Hu.1 | (COVID-, 2 doses) | (COVID-, 3 doses) | 0·15    |
| Supp Fig 4a | SOT: ≤6mo w/ MMF   | Wu-Hu.1 | (COVID-, 2 doses) | (COVID-, 4 doses) | 0·18    |
| Supp Fig 4a | SOT: ≤6mo w/ MMF   | Wu-Hu.1 | (COVID-, 3 doses) | (COVID-, 4 doses) | 1·00    |
| Supp Fig 4a | SOT: ≤6mo w/ MMF   | Wu-Hu.1 | (COVID-, 4 doses) | (COVID+, 4 doses) | 0·33    |
| Supp Fig 4a | SOT: >6mo w/ MMF   | Wu-Hu.1 | (COVID-, 2 doses) | (COVID-, 3 doses) | 0·011   |
| Supp Fig 4a | SOT: >6mo w/ MMF   | Wu-Hu.1 | (COVID-, 2 doses) | (COVID-, 4 doses) | 0·14    |
| Supp Fig 4a | SOT: >6mo w/ MMF   | Wu-Hu.1 | (COVID-, 3 doses) | (COVID-, 4 doses) | 1·00    |
| Supp Fig 4a | SOT: >6mo w/o MMF  | Wu-Hu.1 | (COVID-, 2 doses) | (COVID-, 3 doses) | 0·0029  |
| Supp Fig 4a | SOT: >6mo w/o MMF  | Wu-Hu.1 | (COVID-, 2 doses) | (COVID-, 4 doses) | 0·0012  |
| Supp Fig 4a | SOT: >6mo w/o MMF  | Wu-Hu.1 | (COVID-, 3 doses) | (COVID-, 4 doses) | 0·017   |
| Supp Fig 4a | CLL: Ibrutinib     | Wu-Hu.1 | (COVID-, 2 doses) | (COVID-, 3 doses) | 1·00    |
| Supp Fig 4a | CLL: Ibrutinib     | Wu-Hu.1 | (COVID-, 2 doses) | (COVID-, 4 doses) | 1·00    |
| Supp Fig 4a | CLL: Ibrutinib     | Wu-Hu.1 | (COVID-, 3 doses) | (COVID-, 4 doses) | 1·00    |
| Supp Fig 4a | CLL: Off Ibrutinib | Wu-Hu.1 | (COVID-, 2 doses) | (COVID-, 3 doses) | 0·66    |
| Supp Fig 4a | CLL: Indolent      | Wu-Hu.1 | (COVID-, 2 doses) | (COVID-, 3 doses) | <0·0001 |
| Supp Fig 4a | CLL: Indolent      | Wu-Hu.1 | (COVID-, 2 doses) | (COVID-, 4 doses) | <0·0001 |
| Supp Fig 4a | CLL: Indolent      | Wu-Hu.1 | (COVID-, 3 doses) | (COVID-, 4 doses) | 0·16    |
| Supp Fig 4a | CLL: Indolent      | Wu-Hu.1 | (COVID-, 3 doses) | (COVID+, 3 doses) | 1·00    |
| Supp Fig 4a | CLL: BR/FCR        | Wu-Hu.1 | (COVID-, 2 doses) | (COVID-, 3 doses) | 0·015   |
| Supp Fig 4a | CLL: BR/FCR        | Wu-Hu.1 | (COVID-, 2 doses) | (COVID-, 4 doses) | 0·0002  |
| Supp Fig 4a | CLL: BR/FCR        | Wu-Hu.1 | (COVID-, 3 doses) | (COVID-, 4 doses) | 0·18    |
| Supp Fig 4b | HC: >60 yrs        | BA.1    | (COVID-, 2 doses) | (COVID-, 3 doses) | 0·39    |
| Supp Fig 4b | HC: >60 yrs        | BA.1    | (COVID-, 3 doses) | (COVID+, 3 doses) | 0·90    |
| Supp Fig 4b | HC: 40-59 yrs      | BA.1    | (COVID-, 2 doses) | (COVID-, 3 doses) | 0·37    |
| Supp Fig 4b | HC: 40-59 yrs      | BA.1    | (COVID-, 3 doses) | (COVID+, 3 doses) | 0·045   |
| Supp Fig 4b | HC: 18-39 yrs      | BA.1    | (COVID-, 2 doses) | (COVID-, 3 doses) | 1·00    |
| Supp Fig 4b | HC: 18-39 yrs      | BA.1    | (COVID-, 3 doses) | (COVID+, 3 doses) | 0·097   |
| Supp Fig 4b | PID: CVID          | BA.1    | (COVID-, 2 doses) | (COVID-, 3 doses) | 0·15    |
| Supp Fig 4b | PID: CVID          | BA.1    | (COVID-, 2 doses) | (COVID-, 4 doses) | 1·00    |
| Supp Fig 4b | PID: CVID          | BA.1    | (COVID-, 3 doses) | (COVID-, 4 doses) | 1·00    |
| Supp Fig 4b | PID: CVID          | BA.1    | (COVID-, 3 doses) | (COVID+, 3 doses) | 1·00    |
| Supp Fig 4b | PID: CVID          | BA.1    | (COVID-, 4 doses) | (COVID+, 4 doses) | 1·00    |
| Supp Fig 4b | PID: CVID          | BA.1    | (COVID+, 3 doses) | (COVID+, 4 doses) | 1·00    |
| Supp Fig 4b | PID: CD4-cytopenia | BA.1    | (COVID-, 2 doses) | (COVID-, 3 doses) | 0·49    |
| Supp Fig 4b | PID: CD4-cytopenia | BA.1    | (COVID-, 2 doses) | (COVID-, 4 doses) | 0·40    |

|             |                    |              |                   |                   |         |
|-------------|--------------------|--------------|-------------------|-------------------|---------|
| Supp Fig 4b | PID: CD4-cytopenia | BA.1         | (COVID-, 3 doses) | (COVID-, 4 doses) | 1·00    |
| Supp Fig 4b | HIV: ≤CD4 300      | BA.1         | (COVID-, 2 doses) | (COVID-, 3 doses) | 0·81    |
| Supp Fig 4b | HIV: >CD4 300      | BA.1         | (COVID-, 2 doses) | (COVID-, 3 doses) | 1·00    |
| Supp Fig 4b | HIV: >CD4 300      | BA.1         | (COVID-, 2 doses) | (COVID+, 2 doses) | 1·00    |
| Supp Fig 4b | HIV: >CD4 300      | BA.1         | (COVID-, 3 doses) | (COVID+, 3 doses) | 0·39    |
| Supp Fig 4b | HIV: >CD4 300      | BA.1         | (COVID+, 2 doses) | (COVID+, 3 doses) | 1·00    |
| Supp Fig 4b | HSCT: Intermediate | BA.1         | (COVID-, 2 doses) | (COVID-, 3 doses) | 1·00    |
| Supp Fig 4b | HSCT: Intermediate | BA.1         | (COVID-, 2 doses) | (COVID-, 4 doses) | 0·011   |
| Supp Fig 4b | HSCT: Intermediate | BA.1         | (COVID-, 3 doses) | (COVID-, 4 doses) | 0·35    |
| Supp Fig 4b | HSCT: Late         | BA.1         | (COVID-, 2 doses) | (COVID-, 3 doses) | 1·00    |
| Supp Fig 4b | HSCT: Late         | BA.1         | (COVID-, 2 doses) | (COVID-, 4 doses) | 0·0009  |
| Supp Fig 4b | HSCT: Late         | BA.1         | (COVID-, 3 doses) | (COVID-, 4 doses) | 0·016   |
| Supp Fig 4b | HSCT: Late         | BA.1         | (COVID-, 3 doses) | (COVID+, 3 doses) | 0·017   |
| Supp Fig 4b | SOT: ≤6mo w/ MMF   | BA.1         | (COVID-, 2 doses) | (COVID-, 3 doses) | 1·00    |
| Supp Fig 4b | SOT: ≤6mo w/ MMF   | BA.1         | (COVID-, 2 doses) | (COVID-, 4 doses) | 1·00    |
| Supp Fig 4b | SOT: ≤6mo w/ MMF   | BA.1         | (COVID-, 3 doses) | (COVID-, 4 doses) | 1·00    |
| Supp Fig 4b | SOT: ≤6mo w/ MMF   | BA.1         | (COVID-, 4 doses) | (COVID+, 4 doses) | 1·00    |
| Supp Fig 4b | SOT: >6mo w/ MMF   | BA.1         | (COVID-, 2 doses) | (COVID-, 3 doses) | 0·020   |
| Supp Fig 4b | SOT: >6mo w/ MMF   | BA.1         | (COVID-, 2 doses) | (COVID-, 4 doses) | 0·30    |
| Supp Fig 4b | SOT: >6mo w/ MMF   | BA.1         | (COVID-, 3 doses) | (COVID-, 4 doses) | 1·00    |
| Supp Fig 4b | SOT: >6mo w/o MMF  | BA.1         | (COVID-, 2 doses) | (COVID-, 3 doses) | 1·00    |
| Supp Fig 4b | SOT: >6mo w/o MMF  | BA.1         | (COVID-, 2 doses) | (COVID-, 4 doses) | 0·31    |
| Supp Fig 4b | SOT: >6mo w/o MMF  | BA.1         | (COVID-, 3 doses) | (COVID-, 4 doses) | 0·10    |
| Supp Fig 4b | CLL: Ibrutinib     | BA.1         | (COVID-, 2 doses) | (COVID-, 3 doses) | 0·25    |
| Supp Fig 4b | CLL: Ibrutinib     | BA.1         | (COVID-, 2 doses) | (COVID-, 4 doses) | 0·051   |
| Supp Fig 4b | CLL: Ibrutinib     | BA.1         | (COVID-, 3 doses) | (COVID-, 4 doses) | 0·86    |
| Supp Fig 4b | CLL: Off Ibrutinib | BA.1         | (COVID-, 2 doses) | (COVID-, 3 doses) | 0·23    |
| Supp Fig 4b | CLL: Indolent      | BA.1         | (COVID-, 2 doses) | (COVID-, 3 doses) | 0·86    |
| Supp Fig 4b | CLL: Indolent      | BA.1         | (COVID-, 2 doses) | (COVID-, 4 doses) | 0·23    |
| Supp Fig 4b | CLL: Indolent      | BA.1         | (COVID-, 3 doses) | (COVID-, 4 doses) | 0·39    |
| Supp Fig 4b | CLL: Indolent      | BA.1         | (COVID-, 3 doses) | (COVID+, 3 doses) | 1·00    |
| Supp Fig 4b | CLL: BR/FCR        | BA.1         | (COVID-, 2 doses) | (COVID-, 3 doses) | 1·00    |
| Supp Fig 4b | CLL: BR/FCR        | BA.1         | (COVID-, 2 doses) | (COVID-, 4 doses) | 0·50    |
| Supp Fig 4b | CLL: BR/FCR        | BA.1         | (COVID-, 3 doses) | (COVID-, 4 doses) | 1·00    |
| Supp Fig 5  | HC                 | Nucleocapsid | COVID+            | COVID-            | <0·0001 |
| Supp Fig 5  | PID                | Nucleocapsid | COVID+            | COVID-            | <0·0001 |
| Supp Fig 5  | HIV                | Nucleocapsid | COVID+            | COVID-            | 0·0075  |
| Supp Fig 5  | HSCT               | Nucleocapsid | COVID+            | COVID-            | <0·0001 |
| Supp Fig 5  | SOT                | Nucleocapsid | COVID+            | COVID-            | 0·0002  |
| Supp Fig 5  | CLL                | Nucleocapsid | COVID+            | COVID-            | 0·0064  |

Supplementary Table S1. Non-dichotomized p-values



| Study subjects [n, %]                                              | Drop-outs        |                  | Reconsented study cohort |                  | Statistics                   |
|--------------------------------------------------------------------|------------------|------------------|--------------------------|------------------|------------------------------|
|                                                                    | Males            | Females          | Males                    | Females          | p-value                      |
| HC                                                                 | 14 (43·8%)       | 18 (56·2%)       | 25 (43·1%)               | 33 (56·9%)       | 0·0489                       |
| PID                                                                | 13 (48·1%)       | 14 (51·9%)       | 22 (34·9%)               | 41 (65·1%)       | 0·0004                       |
| HIV                                                                | 23 (65·7%)       | 12 (34·3%)       | 32 (58·2%)               | 23 (41·8%)       | 0·0895                       |
| HSCT                                                               | 15 (53·6%)       | 13 (46·4%)       | 32 (51·6%)               | 30 (48·4%)       | 0·0137                       |
| SOT                                                                | 19 (52·8%)       | 17 (47·2%)       | 27 (50·9%)               | 26 (49·1%)       | 0·2221                       |
| CLL                                                                | 19 (76·0%)       | 6 (24·0%)        | 41 (63·1%)               | 24 (36·9%)       | 0·0014                       |
| <b>Age in years [median, IQR]</b>                                  |                  |                  |                          |                  | <b>p-value</b>               |
| HC                                                                 | 35·5 (28·0-51·0) | 55·0 (36·0-69·0) | 55·0 (36·0-69·0)         | 57·0 (43·0-68·0) | 0·0759                       |
| PID                                                                | 38·0 (31·0-42·0) | 47·0 (38·3-53·0) | 47·0 (38·3-53·0)         | 55·0 (47·0-66·0) | 0·0002                       |
| HIV                                                                | 53·0 (40·5-60·5) | 58·5 (49·0-68·5) | 58·5 (49·0-68·5)         | 49·0 (43·0-62·5) | 0·0563                       |
| HSCT                                                               | 50·0 (39·0-57·5) | 62·0 (54·8-68·0) | 62·0 (54·8-68·0)         | 60·5 (50·3-67·8) | 0·0006                       |
| SOT                                                                | 55·0 (48·5-65·0) | 59·0 (51·5-64·5) | 59·0 (51·5-64·5)         | 53·5 (43·0-64·0) | 0·7570                       |
| CLL                                                                | 63·0 (59·0-74·5) | 70·0 (63·0-74·0) | 70·0 (63·0-74·0)         | 75·0 (69·8-79·5) | 0·0473                       |
| <b>Ab titres at day 35 in AU/ml [geometric mean, geometric SD]</b> |                  |                  |                          |                  | <b>GMR (95% CI), p-value</b> |
| HC                                                                 | 3452·5 (2·4)     | 2800·4 (1·9)     | 2215·8 (2·6)             | 1972·9 (2·1)     | 0·68 (0·48, 0·95), 0·030     |
| PID                                                                | 35·6 (91·1)      | 78·0 (62·1)      | 23·8 (45·7)              | 102·8 (27·0)     | 1·21 (0·18, 8·23), 0·835     |
| HIV                                                                | 1565·0 (2·4)     | 1450·0 (2·8)     | 1790·4 (6·1)             | 1236·2 (8·0)     | 1·02 (0·56, 1·86), 0·965     |
| HSCT                                                               | 463·6 (47·6)     | 1131·1 (41·7)    | 243·6 (33·3)             | 476·4 (34·9)     | 0·46 (0·09, 2·50), 0·361     |
| SOT                                                                | 13·2 (41·5)      | 4·9 (22·2)       | 2·6 (22·2)               | 4·6 (26·5)       | 0·41 (0·10, 1·72), 0·220     |
| CLL                                                                | 6·5 (27·6)       | 0·4 (1·0)        | 14·7 (19·6)              | 30·5 (19·4)      | 4·81 (0·94, 24·68), 0·056    |

For sex, a two-sided binomial test with the null hypothesis that the proportion of females is the same for the reconsented study and those who dropped out was used. For age and antibody titres, p-values were calculated using Mann-Whitney U test and Independent t-test, respectively. For all statistics, study-group comparisons were made (male + female) between drop-outs and reconsented study group. GMR = geometric mean ratio, CI = Confidence interval, IQR = interquartile range

**Supplementary Table S2. Demographics and antibody titers in reconsented study subjects and drop-outs.**

|                       | Third dose                                  |                                     | Fourth dose                                 |                                     |
|-----------------------|---------------------------------------------|-------------------------------------|---------------------------------------------|-------------------------------------|
|                       | BNT162b2<br>(Comirnaty,<br>Pfizer/BioNTech) | mRNA-1273<br>(Spikevax,<br>Moderna) | BNT162b2<br>(Comirnaty,<br>Pfizer/BioNTech) | mRNA-1273<br>(Spikevax,<br>Moderna) |
| <b>HC subgroups</b>   |                                             |                                     |                                             |                                     |
| 18-39 yrs             | 11                                          | 3                                   |                                             |                                     |
| 40-59 yrs             | 11                                          | 8                                   |                                             |                                     |
| >60 yrs               | 20                                          | 1                                   |                                             |                                     |
| <b>PID subgroups</b>  |                                             |                                     |                                             |                                     |
| CVID                  | 32                                          | 3                                   | 4                                           | 18                                  |
| XLA                   | 2                                           | ..                                  | ..                                          | 1                                   |
| Monogenic disease     | 2                                           | 2                                   | ..                                          | 1                                   |
| CD4-cytopenia         | 10                                          | ..                                  | 3                                           | 3                                   |
| Other                 | 5                                           | ..                                  | ..                                          | ..                                  |
| <b>HIV subgroups</b>  |                                             |                                     |                                             |                                     |
| ≤CD4 300              | 7                                           | 4                                   |                                             |                                     |
| >CD4 300              | 26                                          | 8                                   |                                             |                                     |
| <b>HSCT subgroups</b> |                                             |                                     |                                             |                                     |
| Early                 | 4                                           | ..                                  | 1                                           | 3                                   |
| Intermediate          | 10                                          | ..                                  | 4                                           | 4                                   |
| Late                  | 41                                          | 1                                   | 3                                           | 24                                  |
| <b>SOT subgroups</b>  |                                             |                                     |                                             |                                     |
| ≤6mo                  | 30                                          | ..                                  | 3                                           | 12                                  |
| >6mo w/ MMF           | 19                                          | ..                                  | 4                                           | 8                                   |
| >6mo w/o MMF          | 34                                          | ..                                  | 6                                           | 11                                  |
| <b>CLL subgroups</b>  |                                             |                                     |                                             |                                     |
| Ibrutinib             | 15                                          | ..                                  | 1                                           | 12                                  |
| Off Ibrutinib         | 6                                           | 2                                   | 1                                           | 4                                   |
| Indolent              | 23                                          | 2                                   | 4                                           | 12                                  |
| BR/FCR                | 14                                          | ..                                  | 1                                           | 13                                  |

**Supplementary Table S3. Number of administered 3rd and 4th vaccine doses**
